# Supplementary material for: Young adult women smokers’ response to using plain cigarette packaging: a naturalistic approach
Source: PubMed Central journal article supplement — BMJ Open. 2013 Mar 18;3(3):e002402. doi: 10.1136/bmjopen-2012-002402 (PMC3612772; doi:10.1136/bmjopen-2012-002402), 2013-03-18
Supplement: bmjopen-2012-002402.draft_revisions.pdf [file bmjopen-2012-002402.draft_revisions.pdf]

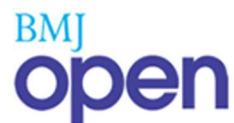

**Young adult women smokers' response to using plain cigarette packaging: A naturalistic approach**

|                                 |                                                                                                                                                                                                                                      |
|---------------------------------|--------------------------------------------------------------------------------------------------------------------------------------------------------------------------------------------------------------------------------------|
| Journal:                        | <i>BMJ Open</i>                                                                                                                                                                                                                      |
| Manuscript ID:                  | bmjopen-2012-002402                                                                                                                                                                                                                  |
| Article Type:                   | Research                                                                                                                                                                                                                             |
| Date Submitted by the Author:   | 25-Nov-2012                                                                                                                                                                                                                          |
| Complete List of Authors:       | Moodie, Crawford; University of Stirling, Centre for Tobacco Control Research, Institute for Social Marketing<br>Mackintosh, Anne Marie; University of Stirling, Centre for Tobacco Control Research, Institute for Social Marketing |
| <b>Primary Subject Heading</b>: | Smoking and tobacco                                                                                                                                                                                                                  |
| Secondary Subject Heading:      | Public health                                                                                                                                                                                                                        |
| Keywords:                       | PUBLIC HEALTH, PREVENTIVE MEDICINE, Health policy < HEALTH SERVICES ADMINISTRATION & MANAGEMENT                                                                                                                                      |
|                                 |                                                                                                                                                                                                                                      |

SCHOLARONE™  
Manuscripts

Peer Review Only

1  
2  
3 Title: Young adult women smokers' response to using plain cigarette packaging: A  
4  
5 naturalistic approach  
6  
7  
8

9  
10 Corresponding author: Crawford Moodie, Centre for Tobacco Control Research, Institute for  
11  
12 Social Marketing, University of Stirling, Stirling FK9 4LA, Scotland. Tel: (+44) 01786  
13  
14 466456. Email: [c.s.moodie@stir.ac.uk](mailto:c.s.moodie@stir.ac.uk)  
15  
16

17  
18 Authors: Crawford Moodie, Anne Marie Mackintosh  
19  
20

21  
22  
23 Author affiliations: Centre for Tobacco Control Research, Institute for Social Marketing,  
24  
25 University of Stirling, Stirling FK9 4LA, Scotland  
26  
27

28  
29 Running title: Young women smokers' response to plain packaging  
30  
31

32  
33  
34 Keywords: Tobacco, plain packaging, young adults  
35  
36

37  
38 Word count: 3,942  
39  
40  
41  
42  
43  
44  
45  
46  
47  
48  
49  
50  
51  
52  
53  
54  
55  
56  
57  
58  
59  
60

1  
2  
3 **Young adult women smokers' response to using plain cigarette packaging: A**  
4  
5 **naturalistic approach**  
6  
7  
8

9  
10 **Abstract**

11 **Objectives:** To explore young adult women smokers' response to using dark brown 'plain'  
12 cigarette packs in natural settings and whether plain packaging is associated with any short-  
13 term change in smoking behaviour.  
14  
15

16 **Design:** A naturalistic approach. Participants used plain cigarette packs provided to them for  
17 one week and their own fully branded packs for one week, but otherwise smoked and  
18 socialised as normal. Participants completed questionnaires twice a week.  
19  
20  
21  
22

23 **Setting:** The six largest cities and towns in Scotland.  
24  
25

26 **Participants:** 301 young women smokers were recruited, with a final sample of 188 (62.5%).  
27 To meet the inclusion criteria women had to be between the ages of 18 and 35, daily cigarette  
28 smokers, and provide a breath sample to confirm smoking status.  
29  
30  
31  
32

33 **Primary and secondary outcome measures:** Pack perceptions and feelings, feelings about  
34 smoking, salience and perceptions of health warnings, and avoidant and cessation behaviours.  
35  
36  
37

38 **Results:** In comparison to branded packaging, plain packaging was associated with more  
39 negative perceptions and feelings about the pack and about smoking ( $p<0.001$ ). No  
40 significant overall differences in salience, seriousness or believability of health warnings  
41 were found between the pack types, but participants reported looking more closely at the  
42 warnings on plain packs and also thinking more about what the warnings were telling them  
43 ( $p<0.001$ ). Participants reported being more likely to engage in avoidant behaviours, such as  
44 hiding or covering the pack ( $p<0.001$ ), and cessation behaviours, such as foregoing cigarettes  
45 ( $p<0.05$ ), smoking less around others ( $p<0.001$ ), thinking about quitting ( $p<0.001$ ) and  
46  
47  
48  
49  
50  
51  
52  
53  
54  
55  
56  
57  
58  
59  
60

1  
2  
3 reduced consumption ( $p<0.05$ ), when using the plain packs. Results did not differ by  
4  
5 dependence level or socio-economic status.  
6

7 **Conclusions:** No research design can capture the true impacts of plain packaging prior to its  
8  
9 introduction, but plain packaging may help to reduce cigarette consumption and encourage  
10  
11 cessation in the short-term.  
12  
13

14  
15  
16  
17  
18  
19  
20  
21  
22  
23  
24  
25  
26  
27  
28  
29  
30  
31  
32  
33  
34  
35  
36  
37  
38  
39  
40  
41  
42  
43  
44  
45  
46  
47  
48  
49  
50  
51  
52  
53  
54  
55  
56  
57  
58  
59  
60

For peer review only

## ARTICLE SUMMARY

### Article focus

- How young adult women smokers respond to using plain cigarette packaging, in comparison to fully branded packaging. We explored the impact of plain packaging on short-term smoking related behaviour

### Key messages

- Plain packaging was associated with lower ratings of enjoyment and satisfaction of smoking in comparison with fully branded packaging
- Participants reported looking more closely at the health warnings on plain packs and also thinking more about what the warnings were telling them
- Plain packaging, in comparison with fully branded packaging, was associated with forgoing cigarettes, smoking less around others, increased thoughts of cessation and reduced consumption

### Strengths and limitations

- The main strength of the study is that it allows an insight into how smokers respond to plain packaging before it has been introduced
- The main limitations are the novelty of the plain packaging and reliance on self-reported smoking behaviour

## Introduction

At the annual meeting of the Canadian Medical Association in 1986 it was proposed that all tobacco products should come in 'plain' brown standardised packs in order to minimise their attractiveness.<sup>1</sup> A quarter of a century on and plain tobacco packaging will be introduced for all tobacco products in Australia from December 2012. Prior to this consultations on plain packaging ended in New Zealand in October and in the United Kingdom (UK) in August. What the actual impacts of plain packaging will be, if any, remains to be seen however. A recent systematic review of the plain packaging literature, with 37 included studies, suggests that plain packaging may have a number of potential public health benefits, including: 1) reducing the appeal of the pack, product and user, 2) increasing the salience, believability and seriousness of the health warnings, although this was influenced by the type (pictorial or text), size and strength of the warnings used, and 3) increasing perceptions of harm, although this was dependent upon the colour of the plain pack, with darker coloured plain packs typically perceived as more harmful, and lighter coloured plain packs less harmful, than fully branded cigarette packs.<sup>2</sup>

One of the longstanding criticisms of the literature is that existing research typically involves gauging consumer response to plain packaging following brief exposure in a controlled environment and, as a result, fails to capture how consumers would react to and use plain packs over time in naturalistic settings. To date only one study has attempted a real world test of plain packaging, using a design which involved young adult smokers in Glasgow (Scotland) transferring cigarettes from their own packs into plain packs provided and using these packs instead of their own packs for two weeks, and their own packs for two weeks to allow for comparison.<sup>3</sup> Pack perceptions and feelings, and feelings about smoking, were more negative for plain packs, and participants were more likely to report avoidant behaviours (e.g.

1  
2  
3 covering the pack) and cessation related behaviours (e.g. thinking about quitting) when using  
4  
5 the plain packs. The pilot nature of this study, recruitment within a single city and relatively  
6  
7 small final sample (N=48) means that further research is needed to test these findings.  
8  
9

10  
11 We aimed to extend this previous study with a larger and more nationally distributed sample  
12  
13 of young adult women smokers. While high rates of smoking among women tend to be the  
14  
15 norm in most of Europe, with a prevalence of 20% or more in all but four of EU member  
16  
17 countries (Italy, Portugal, Slovakia and Sweden), this contrasts sharply with much of the rest  
18  
19 of the world.<sup>4</sup> Prevalence of smoking among women is less than 20% in the Middle East,  
20  
21 North and Central America and Asia (excluding Lebanon and Nepal), and less than 10% in  
22  
23 Africa, where figures are available.<sup>4</sup> In the UK smoking prevalence among women is  
24  
25 currently 20% and in long-term decline, but even so prevalence remains particularly high for  
26  
27 young adult women, with 25% of 25-34 year old women and 30% of 20-24 year old women  
28  
29 smokers.<sup>5</sup>  
30  
31  
32  
33  
34  
35

36 The high smoking rates among young women in the UK represents a significant future  
37  
38 burden of both mortality and morbidity should this trend not be reversed. With a growing  
39  
40 number of slim, elegant cigarette packs targeted at young women being brought to market in  
41  
42 the UK and elsewhere within the last five years, and given that the aesthetic appeal of  
43  
44 cigarette packaging appears to be more important for young women than for young men,<sup>3,6,7</sup>  
45  
46 plain packaging may have a role to play in reducing the high rates of smoking among young  
47  
48 women. This study explored young women's experiences of using plain cigarette packaging  
49  
50 as they went about their everyday lives.  
51  
52  
53  
54  
55

## 56 **Methods**

57  
58  
59  
60

### *Design and sample*

Between June 2011 and March 2012 young adult female smokers (N=301) were recruited from eight postcode sectors from within the six most populated towns and cities in Scotland (Glasgow, Edinburgh, Aberdeen, Dundee, Paisley, East Kilbride) using random location quota sampling. The postcode sectors were randomly selected, stratified by DEPCAT score, which is a measure of multiple deprivation, to ensure coverage of a range of socio-economic backgrounds. Within each postcode sector market recruiters were instructed to recruit either six or seven participants, using the door knock method, according to quota controls on age (18-24 / 25-35) and daily consumption (light, moderate smokers were defined as those smoking 14 cigarettes a day or less / heavy smokers as those smoking 15 cigarettes a day or more). All potential participants were informed by market recruiters, who were briefed about the study protocol but blind to the purpose of the study, that the study was concerned with smokers' opinions of cigarette packaging. If individuals were willing to participate and available for the duration of the study, they were asked to complete a recruitment questionnaire, which included the Fagerström Test for Nicotine Dependence<sup>8</sup> and questions regarding risk perceptions and cessation behaviour (e.g. motivation to quit, attempts to quit). To ensure only smokers were recruited participants were asked to provide a breath test using a piCO<sup>+</sup>™ Carbon Monoxide monitor (Bedfont Scientific) and also an empty cigarette pack; in the four instances where a participant only had a full pack, recruiters took a photo of their pack and texted this to a member of the research team. Ethics approval was obtained from the ethics committee of the Marketing Department at the University of Stirling. Participants provided informed consent before taking part.

### *Materials and procedure*



1  
2  
3 Participants were informed about the study protocol by market recruiters and, if they gave  
4 consent, were provided with a ‘completion’ pack. The completion pack contained: seven  
5 brown (plain) packs with a fictitious brand name Kerrods, to prevent copyright breach, but all  
6 relevant legal markings and a barcode; five numbered questionnaires labelled by day and  
7 date; a timetable explaining when to use their own packs and the Kerrods packs and when to  
8 complete and return each questionnaire.  
9  
10  
11  
12  
13  
14  
15  
16  
17

18 The study ran for two weeks. For either the first or second week, participants were instructed  
19 to transfer cigarettes from their own pack into the Kerrods packs supplied to them and use  
20 these; ordering was randomised with half using the plain pack in the first week and half in the  
21 last week. In the UK cigarettes contain one of two text health warnings used on the front  
22 (‘Smoking kills’ or ‘Smoking seriously harms you and others around you’) and one of  
23 fourteen ‘pictorial’ warnings used on the reverse panel, although three are in fact text  
24 warnings as they do not display a picture, photo, pictogram or symbol. All the Kerrods packs  
25 had the same warning on the pack front (Smoking kills) and one of three ‘pictorial’ warnings  
26 on the reverse panel; a set of healthy and diseased lungs, an image of smoke in a child’s face,  
27 or a text warning about seeking help (see Figure 1). Past research has found these three  
28 warnings to have high, medium and low salience among smokers<sup>9</sup> and they were used to  
29 reflect the types of warnings which smokers receive on packs.  
30  
31  
32  
33  
34  
35  
36  
37  
38  
39  
40  
41  
42  
43  
44  
45  
46  
47  
48  
49  
50  
51

52 Figure 1 here  
53  
54  
55  
56  
57  
58  
59  
60

Participants were instructed to complete questionnaires twice a week (each Thursday and Sunday) and return them via pre-addressed envelopes or by email, see Appendix 1 for questionnaire used. This resulted in two questionnaires relating to their experience of the

1  
2  
3 plain packs and two relating to their own pack; questionnaire number 5 included the same  
4  
5 questions as the pre-study questionnaire about risk perceptions and cessation behaviour, but  
6  
7 is not included in this analysis. Although the day and date each questionnaire was to be  
8  
9 completed and returned was highlighted on the front cover and specified in the timetable, in  
10  
11 an attempt to increase study compliance a text message was sent to each participant the day  
12  
13 before study onset, always a Sunday. The text reminded participants: 1) that the study would  
14  
15 start the next day, 2) what packs they were to use for the coming week, and 3) to complete  
16  
17 questionnaire 1 the following Thursday (the day and date was given for clarity). A second  
18  
19 text message was sent the following Sunday to remind participants to complete and return  
20  
21 questionnaire 2 that day, and on which packs to use for the following week. A third and final  
22  
23 text was sent the subsequent Sunday, reminding participants to complete and return  
24  
25 questionnaires 4 and 5 that day. Participants were also sent a reminder letter during the first  
26  
27 week of the study and an email was sent every Thursday and Sunday morning to participants  
28  
29 who had provided an email address as an additional reminder to complete and return the  
30  
31 questionnaires. To encourage the return of all the questionnaires participants were informed  
32  
33 that on top of the participation fee (£15.00) they would receive an incrementally greater  
34  
35 payment for each questionnaire returned; £2.50 if they returned one questionnaire, £7.00 if  
36  
37 they returned two questionnaires, £12.00 for three, £20.00 for four and £30.00 for all five.  
38  
39 Participants were provided with an information sheet to remind them of this incremental  
40  
41 payment plan.  
42  
43  
44  
45  
46  
47  
48

## 49 **Analysis**

50  
51 Prior to analysis, some items were recoded to ensure the same direction of coding and thus  
52  
53 facilitate creation and interpretation of composite variables. Composite scores were derived  
54  
55 for pack perceptions, pack feelings, feelings about smoking, and response to warnings, by  
56  
57  
58  
59  
60

1  
2  
3 summing the individual items within each and then rescaling to a five-point scale. Cronbach's  
4  
5 alpha was acceptable for each, all above 0.70 with the exception of the overall health warning  
6  
7 response for own pack which had an alpha of 0.65, thus supporting the decision to create  
8  
9 composite scores for each measure and for each pack type.  
10

11  
12  
13  
14 Ratings between branded and plain packs were compared and to ensure that packs were  
15  
16 compared against equivalent time points, ratings of the plain pack at the first and second  
17  
18 measures were compared with ratings of their own pack at the first and second measures,  
19  
20 respectively. For each time point, paired t-tests were used to produce mean scores for the  
21  
22 plain packs relative to mean scores for their own pack. Given the ordinal nature of the five-  
23  
24 point scales, the Wilcoxon Signed Rank test was used to test for significant differences  
25  
26 between ratings of plain packs versus participant's own packs at each measure. As the data on  
27  
28 avoidant/cessation behaviours were binary (yes/no) the McNemar test was used to test for  
29  
30 differences in response between participants' first and second measure on the plain pack and  
31  
32 the respective measure on their own pack. The number of avoidant/cessation behaviours  
33  
34 associated with each pack was also counted and paired t-tests used to test for differences in  
35  
36 the mean number of actions taken with the Kerrods pack versus their own pack at each  
37  
38 measure. Composite scores for each pack type were also compared across the two time-  
39  
40 points, using Wilcoxon Signed Rank test, to examine whether composite ratings for each  
41  
42 pack type was consistent across time. Paired t-tests were used to compare, at each time-point,  
43  
44 reported daily consumption when using the Kerrods pack versus their own pack.  
45  
46  
47  
48  
49

50  
51  
52 Given the paucity of plain packaging research exploring sub-group differences,<sup>2</sup> analyses of  
53  
54 the composite scores were also run separately to explore whether the results were consistent  
55  
56 by age group (18-24, 25-35), social grade (ABC1, C2DE) and dependence level  
57  
58  
59  
60

1  
2  
3 (low/medium, high). Social grade was measured via occupation. Dependence level was  
4  
5 measured via the Fagerström Test for Nicotine Dependence,<sup>8</sup> with those scoring between 0-5  
6  
7 categorised as having low/medium dependence and those scoring 6-10 high dependence  
8  
9 levels.  
10

## 11 12 13 **RESULTS**

14  
15  
16 Of the 301 participants recruited, 54 (17.9%) were non-completers, who failed to participate  
17  
18 at all after completing the pre-study questionnaire, 59 (19.6%) were partial completers, who  
19  
20 failed to return all the questionnaires or reported using the incorrect pack (e.g. they used their  
21  
22 own packs when they were meant to be using the Kerrods packs), and 188 (62.5%) were full  
23  
24 completers, who returned all the questionnaires and reported using the correct packs.  
25  
26  
27  
28  
29

### 30 **Pack Perceptions**

31  
32 On average, participants rated Kerrods negatively on all pack perceptions (not stylish,  
33  
34 unfashionable, cheap, uncool, unattractive, poor quality, unappealing), with mean scores  
35  
36 ranging from 1.55 to 2.37; lower scores indicating more negative perceptions (see Table 1a).  
37  
38 For their own packs the higher mean scores, ranging from 2.91 to 3.69, indicated more  
39  
40 positive pack perceptions. For the overall pack perception score (all items combined),  
41  
42 participants rated the Kerrods pack more negatively than their own pack, and this did not vary  
43  
44 across time for either pack. Results were consistent by age group, social grade and  
45  
46 dependence level.  
47  
48  
49  
50  
51

52 Table 1 here  
53  
54  
55

### 56 **Pack Feelings** 57 58 59 60

1  
2  
3 On average, participants reported more negative feelings (embarrassed, ashamed, unaccepted)  
4 about using the Kerrods pack, relative to their own pack (see Table 1b). For the Kerrods  
5 pack, mean scores ranged from 2.54 to 3.10, whereas mean scores for their own pack ranged  
6 from 3.26 to 4.08. For both their own packs and the Kerrods packs, pack feelings were more  
7 negative at the second measure. Results were consistent by age group, social grade and  
8 dependence level.  
9  
10  
11  
12  
13  
14  
15  
16  
17  
18

### 19 **Feelings about smoking**

20  
21 Participants reported more negative feelings about smoking from the Kerrods pack (see Table  
22 1c). While participants, on average, rated the smoking experience with their own pack as  
23 more 'enjoyable' (mean scores 3.40) and 'satisfying' (mean scores 3.41 to 3.52), for Kerrods  
24 the average ratings suggested they were less enjoyable (mean scores 2.73 to 2.90) and  
25 satisfying (mean scores 2.83 to 2.99). Participants were more likely to feel 'good' about  
26 smoking when using their own packs (mean scores 3.13 to 3.19) than when using the Kerrods  
27 pack (mean scores 2.68 to 2.73). Overall ratings for their own packs did not vary across time.  
28 For the Kerrods pack, feelings about smoking were rated more negatively at the second  
29 measure ( $p < 0.05$ ). Results were consistent across age group, social grade and dependence  
30 level.  
31  
32  
33  
34  
35  
36  
37  
38  
39  
40  
41  
42  
43  
44

### 45 **Health warnings**

#### 46 *Salience, seriousness and believability*

47  
48 For both pack types, the on-pack health warnings were rated as being noticeable (mean scores  
49 3.41 to 3.44), serious (3.83 to 3.94) and believable (3.91 to 4.10), see Table 2. At the second  
50 measure only, warnings on the Kerrods packs were rated as more believable relative to  
51 participants' own packs. However, overall ratings of the warnings did not differ between the  
52  
53  
54  
55  
56  
57  
58  
59  
60

1  
2  
3 packs, and did not vary across time for either pack. Findings were consistent across age,  
4  
5 social grade and dependence level.  
6  
7

8  
9 Table 2 here  
10

#### 11 12 13 14 *Attention and depth of processing*

15  
16 Warnings were rated as being read more closely on the Kerrods pack (mean scores 2.97 to  
17  
18 3.00) than on their own packs (mean scores 2.28 to 2.58), and thought about more on the  
19  
20 Kerrods pack (mean scores 3.02 to 3.16) relative to participants' own packs (mean scores  
21  
22 2.52 to 2.80). The overall results were consistent for the age and dependence level sub-  
23  
24 groups. However, at the second measure, participants from social grade C2DE did not show  
25  
26 any difference, between Kerrods and own pack, in overall warning action response. While  
27  
28 there was no difference in the Kerrods measures across time, the ratings were stronger at the  
29  
30 second own pack measure compared with the first measure ( $p < 0.001$ ).  
31  
32  
33  
34  
35

#### 36 **Avoidant behaviour/Behaviour change**

37  
38 Across the two measures, participants indicated greater occurrence of the following actions  
39  
40 when using the Kerrods packs: keeping the pack out of sight; covering the pack; foregoing  
41  
42 cigarettes; smoking less around others; thinking about quitting (Table 3). In addition, when  
43  
44 using the Kerrods pack, participants were always more likely to stub out a cigarette, although  
45  
46 only significantly so at the second measure. On average, participants reported a higher  
47  
48 number of behaviour changes or avoidant behaviours when using the Kerrods pack (1.88 and  
49  
50 2.29 at the first and second measures respectively) compared with their own pack (0.84 and  
51  
52 1.12 at the first and second measures respectively). This result was consistent by age, social  
53  
54  
55  
56  
57  
58  
59  
60

1  
2  
3 grade and dependence level. For each pack type, the number of behaviour changes/avoidant  
4  
5 behaviours increased at the second measure ( $p<0.001$  for Kerrods and  $p<0.01$  for own pack).  
6  
7

8  
9  
10 At each measure, reported consumption was lower with the Kerrods pack compared with  
11  
12 participants' own pack. For the first measure, average daily consumption was 14.9 when  
13  
14 using Kerrods and 15.5 when their own pack ( $p<0.05$ ), with daily consumption at the second  
15  
16 measure 15.7 when using Kerrods and 16.7 when using their own pack ( $p<0.01$ ).  
17

18  
19 Consumption was higher at the second measure for each pack ( $p<0.05$  for Kerrods and  
20  
21  $p<0.01$  for own pack).  
22  
23

24  
25 Table 3 here  
26  
27

## 28 29 **Discussion**

30  
31 For young adult female smokers, a key target group for public health, the use of dark brown  
32  
33 (plain) cigarette packs in naturalistic settings was associated with more negative perceptions  
34  
35 and feelings about the packaging and about smoking than for their own fully branded packs.  
36  
37 As with past research in the UK the base colour of the plain packs, a faecal brown, was  
38  
39 perceived negatively.<sup>3,7,10-12</sup> Plain packs were also associated with more negative feelings  
40  
41 about the pack, in terms of embarrassment and shame, lower ratings of enjoyment and  
42  
43 satisfaction of smoking, and increased avoidant (hiding and covering the pack) and cessation  
44  
45 related smoking behaviours (stubbing out cigarettes early, forgoing cigarettes and reduced  
46  
47 consumption).  
48  
49  
50  
51

## 52 53 **Study strengths**

54  
55  
56  
57  
58  
59  
60

1  
2  
3 The study permits an insight into how smokers respond to plain packaging in natural settings  
4 before it has been introduced. It is difficult to envisage an alternative approach which would  
5 allow smoking related behaviours to be captured, such as stubbing out cigarettes early,  
6 forgoing cigarettes and reduced consumption. Similarly, as the study did not involve forced  
7 exposure to packaging it more accurately reflects how smokers respond to the on-pack health  
8 warnings, in respect to the attention they are given, how they are perceived and also how  
9 deeply they are processed. There were no significant overall differences in ratings of warning  
10 salience, seriousness and believability, consistent with a pilot naturalistic study and two  
11 recent eye-tracking studies from the UK.<sup>3,13,14</sup> Warning design may, in part, help explain  
12 these findings. The positioning of images only on the reverse panel of packaging is  
13 inconsistent with the Guidelines for Article 11 of the Framework Convention on Tobacco  
14 Control<sup>15</sup> and best international practice - only two countries outside of Europe, Brazil and  
15 Venezuela, fail to use pictorial warnings on the pack front - and has been found to reduce  
16 warning effectiveness.<sup>9,16</sup> Similarly, lack of rotation is likely to have increased wear-out;  
17 although images appeared on the reverse panel of packs in the UK in 2008 to support the  
18 warning text, these text has been on packs since 2003. Warnings on plain packs were read  
19 more closely and thought about more than on fully branded packs however. That warnings on  
20 plain packs were attended to more closely and more deeply processed has not, we believe,  
21 been previously reported in the plain packaging literature, and as such advances our  
22 understanding of the possible real-world impacts of plain packaging.

23  
24  
25  
26  
27  
28  
29  
30  
31  
32  
33  
34  
35  
36  
37  
38  
39  
40  
41  
42  
43  
44  
45  
46  
47  
48  
49  
50 It is not only cessation related behaviours such as stubbing out or forgoing cigarettes which  
51 can be captured with such an approach, but also behaviours such as smoking less around  
52 other people. The UK Department of Health speculate that a potential benefit of plain  
53 packaging could be to reduce exposure to second-hand smoke (SHS) from reduced rates of  
54  
55  
56  
57  
58  
59  
60



1  
2  
3 smoking,<sup>17</sup> which would reduce the high annual direct costs to the NHS incurred by treating  
4  
5 illness related to exposure to SHS.<sup>18</sup> That young women reported smoking less around others  
6  
7 when using the plain packs suggests that the appearance of the pack, and how it makes some  
8  
9 young women feel and think about smoking, may in itself lead to lower exposure to SHS. The  
10  
11 Department of Health also suggested that future research consider consumer response to plain  
12  
13 packaging across socioeconomic groups,<sup>17</sup> which is somewhat surprisingly lacking in the  
14  
15 existing literature.<sup>2</sup> We found no significant differences across income group, or indeed by  
16  
17 age or dependence level. While this suggests that plain packaging can help benefit all young  
18  
19 women caution should be exercised as the sample size did not permit a more detailed  
20  
21 breakdown of socio-economic status or dependence.  
22  
23  
24  
25  
26

### 27 **Limitations**

28  
29 The study has a number of limitations. The reliance on self-reporting, both in terms of  
30  
31 reported behaviour change and the use of the Kerrods packs, is a potential limitation,  
32  
33 although given the high level of participant involvement and the nature of the research it is  
34  
35 difficult to see a viable alternative. One way would have been to provide participants with  
36  
37 their brand of cigarettes already within the plain packs, which would eliminate the need for  
38  
39 cigarettes to be transferred from one pack into another, but ethical concerns prohibited us  
40  
41 from doing so. While the generic brand name (Kerrods), used to avoid breach of copyright,  
42  
43 was intended to be neutral and has previously been found to have no positive or negative  
44  
45 associations among smokers,<sup>7</sup> it is nevertheless possible that this may have had an impact on  
46  
47 participant's perceptions of plain packaging. The findings cannot be generalised to all young  
48  
49 women smokers and provides no insight into the impact of plain packaging on older women  
50  
51 smokers, male smokers or non-smokers, although the exclusive focus on young women was  
52  
53 taken given high smoking prevalence among this group. It is also possible that participants  
54  
55  
56  
57  
58  
59  
60

1  
2  
3 may respond differently if only plain packs were available on the legitimate market. Clearly,  
4  
5 the true impacts of standardising the appearance of all legitimate cigarette packs on the  
6  
7 market remain unclear. Research in Australia can help shed further light on the impacts of  
8  
9 plain packaging but given that Australia has stronger tobacco control and lower prevalence of  
10  
11 nicotine use than anywhere in the European Union (EU), and as the appearance of plain  
12  
13 packaging in Australia would almost certainly differ from that of plain packs in the EU, at  
14  
15 least in terms of the size, type and positioning of the on-pack health warnings, then further  
16  
17 research in Europe and elsewhere using approaches that more closely approximate what  
18  
19 consumers experience when using plain packs in naturalistic settings is required.  
20  
21  
22  
23  
24

### 25 **Implications for policy makers and clinicians**

26  
27 As a number of governments and executive bodies consider the merits of plain packaging as a  
28  
29 policy measure these findings may help inform the decision making process. It is ultimately  
30  
31 for policy makers to assess the potential value of plain packaging as part of a comprehensive  
32  
33 suite of tobacco control measures aimed at reducing consumption and prevalence, but the  
34  
35 collective evidence generally provides support for plain packaging, irrespective of design,  
36  
37 location and sample.<sup>2</sup> This study extends this growing body of evidence and is the first to find  
38  
39 that smokers were more likely to stub out cigarettes early and reduce consumption when  
40  
41 using plain packs. These findings are relevant to the National Institute for Health and Clinical  
42  
43 Excellence (NICE) draft guidelines on harm-reduction approaches to smoking, published in  
44  
45 October 2012,<sup>19</sup> which positions quitting as the target but points to potential health benefits of  
46  
47 consuming fewer cigarettes, or less of each cigarette. Further research is required to provide  
48  
49 greater insight into the impacts of plain packaging on smoking behaviour, and more broadly  
50  
51 what the health benefits, if any, of reduced consumption and intake are,<sup>19</sup> but these findings  
52  
53 contribute to the harm-reduction debate and suggest that plain packaging may have a role to  
54  
55  
56  
57  
58  
59  
60

1  
2  
3 play in this proposed harm-reduction approach. The study also points to opportunities for  
4  
5 clinicians. While plain packaging was found to increase thoughts of quitting, even when  
6  
7 using their own packs between a quarter and a third young women reported thinking about  
8  
9 and wanting to quit. Smoking rates are higher among young women than for older women  
10  
11 and for males of any age,<sup>5</sup> and prevalence among 20-24 year olds has declined at a slower  
12  
13 rate than for any other age group in the last quarter of a century, from 35% in 1984 to 30% in  
14  
15 2010.<sup>5</sup> As such, the desire to change among a significant percentage of such a key target  
16  
17 group suggests that this group may benefit from intervention by clinicians or health care  
18  
19 professionals.  
20  
21  
22  
23  
24

## 25 **Notes**

26  
27 Acknowledgements: Diane Dixon for her help with co-ordinating the study and data input,  
28  
29 and Bedfont Scientific for providing piCO<sup>+</sup>™ Carbon Monoxide monitors.  
30  
31  
32  
33

34 Contributors: CM designed data collection tools, monitored data collection, cleaned the data,  
35  
36 and drafted and revised the paper. CM is guarantor. AMM designed data collection tools,  
37  
38 analysed the data, and drafted and revised the paper.  
39  
40  
41  
42

43 Funding: This work was supported by Cancer Research UK grant number A13467. The  
44  
45 funders had no role in study design; in the collection, analysis, and interpretation of data; in  
46  
47 the writing of the report; and in the decision to submit the article for publication. The  
48  
49 researchers are independent from the funders.  
50  
51  
52  
53

54 Competing interests: None.  
55  
56  
57  
58  
59  
60

1  
2  
3  
4  
5  
6  
7  
8  
9  
10  
11  
12  
13  
14  
15  
16  
17  
18  
19  
20  
21  
22  
23  
24  
25  
26  
27  
28  
29  
30  
31  
32  
33  
34  
35  
36  
37  
38  
39  
40  
41  
42  
43  
44  
45  
46  
47  
48  
49  
50  
51  
52  
53  
54  
55  
56  
57  
58  
59  
60

Ethical approval: The study obtained ethics approval from the ethics committee of the Marketing Department at the University of Stirling. Participants provided informed consent before taking part.

Data sharing: No additional data available.

For peer review only

## References

1. Lee B. Sell tobacco in no-frills wrappers, urge doctors. *The Journal* 1986;10;5.
2. Moodie C, Stead M, Bauld L, et al. *Plain tobacco packaging: A systematic review*. Stirling: Centre for Tobacco Control Research, University of Stirling, 2012.
3. Moodie C, Hastings GB, Mackintosh AM, et al. Young adult smokers' perceptions of plain packaging: A pilot naturalistic study. *Tob Control* 2011;20:367-73.
4. Eriksen M, Mackay J, Ross H. *The tobacco atlas (4<sup>th</sup> Edition)*. Atlanta, Georgia: American Cancer Society, 2012.
5. The NHS Information Centre. *Statistics on Smoking: England, 2012*. London: The Health and Social Care Information Centre, 2012.
6. Doxey J, Hammond D. Deadly in pink: The impact of female-oriented cigarette packaging among young women. *Tob Control* 2011;20:353-60.
7. Moodie C, Ford A. Young adult smokers' perceptions of cigarette pack innovation, pack colour and plain packaging. *Australasian Market J* 2011;19:174-80.
8. Heatherton TF, Kozlowski LT, Frecker RC, et al. The Fagerstrom Test for Nicotine Dependence: A revision of the Fagerstrom Tolerance Questionnaire. *Br J Addictions* 1991;86:1119-27.

- 1  
2  
3 9. Wardle H, Pickup D, Lee L, et al. *Evaluating the impact of picture health warnings on*  
4 *cigarette packets*. London: Public Health Research Consortium, 2012.  
5  
6  
7  
8  
9  
10 10. Moodie C, Ford A, Mackintosh AM, et al. Young people's perceptions of cigarette  
11 packaging and plain packaging: An online survey. *Nic Tob Res* 2012;14:98-105.  
12  
13  
14  
15  
16 11. Ford A, Moodie C, Mackintosh AM, et al. *Youth and tobacco packaging: Awareness,*  
17 *appreciation and receptivity*. Poster presentation at 15<sup>th</sup> World Conference on Tobacco or  
18 Health, Singapore, March 2012.  
19  
20  
21  
22  
23  
24  
25 12. Centre for Tobacco Control Research. *The packaging of tobacco products*. Stirling:  
26 Centre for Tobacco Control Research, University of Stirling; 2012.  
27  
28  
29  
30  
31  
32 13. Munafó M, Roberts N, Bauld L, et al. Plain packaging increases visual attention to  
33 health warnings on cigarette packs in non-smokers and weekly smokers but not daily  
34 smokers. *Addiction* 2011;106:1505-10.  
35  
36  
37  
38  
39  
40  
41 14. Maynard O, Munafó M, Leonards U. Visual attention to health warnings on plain tobacco  
42 packaging in adolescent smokers and non-smokers. *Addiction* (forthcoming).  
43  
44  
45  
46  
47 15. World Health Organisation. *Elaboration of guidelines for implementation of Article 11 of*  
48 *the Convention. Third session of the Conference of the Parties to the WHO Framework*  
49 *Convention on Tobacco Control*. Durban, South Africa, 17–22 November 2008.  
50  
51 [http://www.who.int/fctc/guidelines/article\\_11.pdf](http://www.who.int/fctc/guidelines/article_11.pdf) (accessed 8 September 2012)  
52  
53  
54  
55  
56  
57  
58  
59  
60

1  
2  
3 16. Moodie C, Mackintosh AM, Hastings. *The impact of combined text/pictorial health*  
4 *warnings on cigarette packs compared to text only warnings: Findings from the Youth*  
5 *Tobacco Policy Survey (YTPS)*. Presentation given at Tackling Smoking in the 21<sup>st</sup> Century,  
6  
7 York, November 2012.  
8  
9

10  
11  
12  
13  
14 17. Department of Health. *Consultation on standardised packaging of tobacco products:*  
15 *Equality Impact Assessment*. London: Department of Health, 2012.  
16  
17

18  
19  
20  
21 18. Royal College of Physicians. *Passive smoking and children*. London: Royal College of  
22  
23 Physicians, 2010.  
24

25  
26  
27 19. National Institute for Health and Clinical Excellence. *Tobacco: harm-reduction*  
28 *approaches to smoking*, 2012.  
29

30  
31 <http://www.nice.org.uk/nicemedia/live/13018/61198/61198.pdf>  
32  
33  
34  
35  
36  
37  
38  
39  
40  
41  
42  
43  
44  
45  
46  
47  
48  
49  
50  
51  
52  
53  
54  
55  
56  
57  
58  
59  
60

**Table 1.** Mean ratings on response to Kerrods pack v Own pack for pack perceptions, pack feelings and feelings about smoking

|                                      | 1st Measure |           | 2nd Measure |           |
|--------------------------------------|-------------|-----------|-------------|-----------|
|                                      | Kerrods     | Own       | Kerrods     | Own       |
|                                      | mean        | mean      | mean        | mean      |
|                                      | <i>sd</i>   | <i>sd</i> | <i>sd</i>   | <i>sd</i> |
| <b>a) Pack Perceptions (7 items)</b> |             |           |             |           |
| Style                                | 1.55        | 3.16***   | 1.62        | 3.23***   |
| not stylish(1)/stylish(5)            | 0.88        | 0.99      | 0.90        | 0.98      |
| Fashion                              | 2.30        | 3.07***   | 1.88        | 3.08***   |
| unfashionable(1)/fashionable(5)      | 1.53        | 1.03      | 1.22        | 1.02      |
| Cheap                                | 1.74        | 3.30***   | 1.90        | 3.37***   |
| cheap(1)/expensive(5)                | 0.99        | 1.08      | 1.02        | 1.03      |
| Cool                                 | 1.74        | 2.95***   | 1.76        | 2.91***   |
| uncool(1)/cool(5)                    | 0.87        | 0.99      | 0.89        | 0.94      |
| Attractive                           | 1.78        | 3.03***   | 1.72        | 3.07***   |
| unattractive(1)/attractive(5)        | 1.15        | 1.14      | 0.99        | 1.05      |
| Quality                              | 2.37        | 3.69***   | 2.26        | 3.64***   |
| poor quality(1)/good quality(5)      | 1.16        | 0.95      | 1.11        | 0.93      |
| Appealing                            | 1.81        | 3.19***   | 1.85        | 3.16***   |
| unappealing(1)/appealing(5)          | 1.06        | 1.08      | 1.04        | 0.97      |
| <b>Overall Pack Perceptions</b>      |             |           |             |           |
| Composite score                      | 1.90        | 3.19***   | 1.85        | 3.21***   |
| Low score = negative                 |             |           |             |           |



perceptions / High  
score = positive perceptions

---

**b) Pack Feelings (3 items)**

|                                      |             |                     |             |                     |
|--------------------------------------|-------------|---------------------|-------------|---------------------|
| Embarrassment                        | 2.70        | 4.08 <sup>***</sup> | 2.54        | 3.84 <sup>***</sup> |
| embarrassed(1)/not<br>embarrassed(5) | <i>1.29</i> | <i>1.14</i>         | <i>1.25</i> | <i>1.04</i>         |
| Ashamed                              | 3.10        | 4.02 <sup>***</sup> | 2.71        | 3.72 <sup>***</sup> |
| ashamed(1)/not ashamed(5)            | <i>1.26</i> | <i>1.12</i>         | <i>1.18</i> | <i>1.08</i>         |
| Acceptance                           | 2.69        | 3.37 <sup>***</sup> | 2.55        | 3.26 <sup>***</sup> |
| unaccepted(1)/accepted(5)            | <i>1.02</i> | <i>1.07</i>         | <i>0.95</i> | <i>0.99</i>         |

**Overall Pack Feelings**

|                 |      |                     |      |                     |
|-----------------|------|---------------------|------|---------------------|
| Composite score | 2.84 | 3.82 <sup>***</sup> | 2.60 | 3.62 <sup>***</sup> |
|-----------------|------|---------------------|------|---------------------|

Low score = negative perceptions

/ High

score = positive

perceptions

---

**c) Feelings about smoking**

**(3 items)**

|                                 |             |                     |             |                     |
|---------------------------------|-------------|---------------------|-------------|---------------------|
| Enjoyment                       | 2.90        | 3.40 <sup>***</sup> | 2.73        | 3.40 <sup>***</sup> |
| enjoyable(1)/ enjoyable(5)      | <i>0.97</i> | <i>0.95</i>         | <i>0.97</i> | <i>0.96</i>         |
| Satisfaction                    | 2.99        | 3.52 <sup>***</sup> | 2.83        | 3.41 <sup>***</sup> |
| not satisfying(1)/satisfying(5) | <i>0.99</i> | <i>0.93</i>         | <i>1.00</i> | <i>0.98</i>         |

|   |                |      |                     |      |                     |
|---|----------------|------|---------------------|------|---------------------|
| 1 |                |      |                     |      |                     |
| 2 |                |      |                     |      |                     |
| 3 | Good           | 2.73 | 3.13 <sup>***</sup> | 2.68 | 3.19 <sup>***</sup> |
| 4 |                |      |                     |      |                     |
| 5 | bad(1)/good(5) | 0.87 | 0.93                | 0.95 | 0.98                |
| 6 |                |      |                     |      |                     |
| 7 |                |      |                     |      |                     |
| 8 |                |      |                     |      |                     |
| 9 |                |      |                     |      |                     |

### Overall Feelings Smoking

|    |                 |      |                     |      |                     |
|----|-----------------|------|---------------------|------|---------------------|
| 10 |                 |      |                     |      |                     |
| 11 |                 |      |                     |      |                     |
| 12 | Composite score | 2.88 | 3.36 <sup>***</sup> | 2.75 | 3.34 <sup>***</sup> |
| 13 |                 |      |                     |      |                     |

14 Low score = negative  
 15 perceptions / High  
 16  
 17  
 18 score = positive perceptions  
 19

---

20  
 21  
 22  
 23 \*\*\* p<0.001; \*\* p<0.01; \* p<0.05  
 24  
 25  
 26  
 27  
 28  
 29  
 30  
 31  
 32  
 33  
 34  
 35  
 36  
 37  
 38  
 39  
 40  
 41  
 42  
 43  
 44  
 45  
 46  
 47  
 48  
 49  
 50  
 51  
 52  
 53  
 54  
 55  
 56  
 57  
 58  
 59  
 60

**Table 2.** Mean ratings on response to Kerrods pack v Own pack for health warning salience and credibility, and attention and depth of processing

| <b>Health warnings (salience and credibility)</b>          |             |             |             |             |
|------------------------------------------------------------|-------------|-------------|-------------|-------------|
| Noticing                                                   | 3.44        | 3.43        | 3.41        | 3.25        |
| hardly noticeable(1)/very(5)                               | <i>1.39</i> | <i>1.33</i> | <i>1.40</i> | <i>1.29</i> |
| Seriousness                                                | 3.94        | 3.83        | 3.84        | 3.89        |
| not serious(1)/ serious(5)                                 | <i>1.12</i> | <i>1.12</i> | <i>1.26</i> | <i>1.04</i> |
| Believability                                              | 4.10        | 4.08        | 4.09        | 3.91*       |
| not believable(1)/believable(5)                            | <i>1.09</i> | <i>0.98</i> | <i>1.09</i> | <i>1.06</i> |
| <b>Overall Warning Response</b>                            |             |             |             |             |
| Composite score                                            | 3.92        | 3.77        | 3.77        | 3.67        |
| Low score = little, no impact /                            |             |             |             |             |
| High score                                                 |             |             |             |             |
| = high impact                                              |             |             |             |             |
| <b>Health warnings (attention and depth of processing)</b> |             |             |             |             |
| Attention                                                  | 3.00        | 2.28***     | 2.97        | 2.58***     |
| not looking closely(1)/looking                             |             |             |             |             |
| closely(5)                                                 | <i>1.47</i> | <i>1.34</i> | <i>1.51</i> | <i>1.35</i> |
| Thinking about warnings                                    | 3.02        | 2.52***     | 3.16        | 2.80***     |
| not think about what they are                              | <i>1.41</i> | <i>1.36</i> | <i>1.47</i> | <i>1.34</i> |

telling you(1)/thinking about

what they are telling you(5)

### Overall Warning Action

#### Response

|                 |      |                     |      |                     |
|-----------------|------|---------------------|------|---------------------|
| Composite score | 3.00 | 2.39 <sup>***</sup> | 3.06 | 2.69 <sup>***</sup> |
|-----------------|------|---------------------|------|---------------------|

Low score = little or no action /

high score = high action

---

\*\*\* p<0.001; \*\* p<0.01; \* p<0.05

**Table 3:** Proportion of participants reporting avoidant behaviour or behaviour change as a result of the pack

| Behaviour change /<br>avoidant behaviour | 1st Measure  |          | 2nd Measure  |          |
|------------------------------------------|--------------|----------|--------------|----------|
|                                          | Kerrods<br>% | Own<br>% | Kerrods<br>% | Own<br>% |
| Stub out cigarette                       | 10           | 5        | 17           | 10*      |
| Forego a cigarette                       | 13           | 4**      | 15           | 10*      |
| Keep pack out of sight                   | 53           | 11***    | 55           | 10***    |
| Cover pack                               | 10           | 2***     | 10           | 2***     |
| Smoke less around<br>others              | 21           | 3***     | 39           | 16***    |
| Think about quitting                     | 39           | 26***    | 46           | 34***    |
| Want to quit                             | 33           | 25       | 37           | 32       |
| <i>Mean number of<br/>actions</i>        | 1.88         | 0.84***  | 2.29         | 1.12***  |
| <i>sd</i>                                | 1.80         | 1.36     | 2.16         | 1.61     |

\*\*\* p<0.001; \*\* p<0.01; \* p<0.05

1  
2  
3  
4  
5  
6  
7  
8  
9  
10  
11  
12  
13  
14  
15  
16  
17  
18  
19  
20  
21  
22  
23  
24  
25  
26  
27  
28  
29  
30  
31  
32  
33  
34  
35  
36  
37  
38  
39  
40  
41  
42  
43  
44  
45  
46  
47  
48  
49  
50  
51  
52  
53  
54  
55  
56  
57  
58  
59  
60

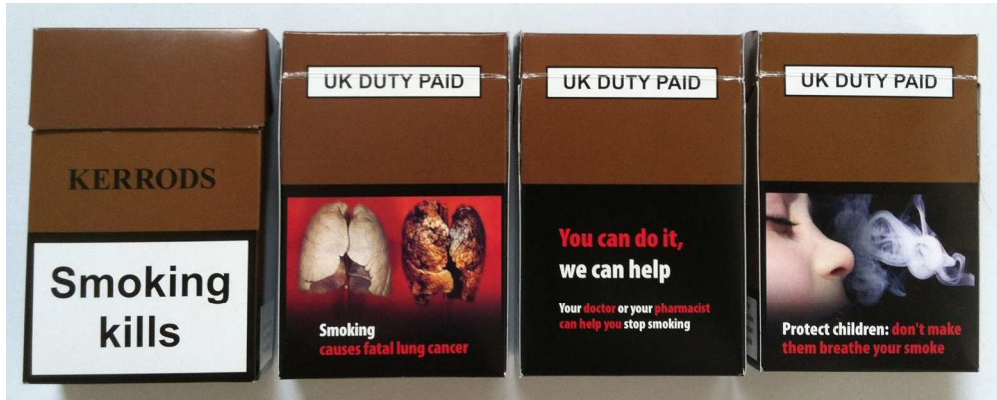

Figure 1: Brown 'plain' packs and health warnings used  
791x315mm (72 x 72 DPI)

Peer review only



**Young adult women smokers' response to using plain cigarette packaging: A naturalistic approach**

|                                 |                                                                                                                                                                                                                                      |
|---------------------------------|--------------------------------------------------------------------------------------------------------------------------------------------------------------------------------------------------------------------------------------|
| Journal:                        | <i>BMJ Open</i>                                                                                                                                                                                                                      |
| Manuscript ID:                  | bmjopen-2012-002402.R1                                                                                                                                                                                                               |
| Article Type:                   | Research                                                                                                                                                                                                                             |
| Date Submitted by the Author:   | 21-Feb-2013                                                                                                                                                                                                                          |
| Complete List of Authors:       | Moodie, Crawford; University of Stirling, Centre for Tobacco Control Research, Institute for Social Marketing<br>Mackintosh, Anne Marie; University of Stirling, Centre for Tobacco Control Research, Institute for Social Marketing |
| <b>Primary Subject Heading</b>: | Smoking and tobacco                                                                                                                                                                                                                  |
| Secondary Subject Heading:      | Public health                                                                                                                                                                                                                        |
| Keywords:                       | PUBLIC HEALTH, PREVENTIVE MEDICINE, Health policy < HEALTH SERVICES ADMINISTRATION & MANAGEMENT                                                                                                                                      |
|                                 |                                                                                                                                                                                                                                      |

SCHOLARONE™  
Manuscripts

Peer review only

1  
2  
3 Title: Young adult women smokers' response to using plain cigarette packaging: A  
4  
5 naturalistic approach  
6  
7  
8

9  
10 Corresponding author: Crawford Moodie, Centre for Tobacco Control Research, Institute for  
11  
12 Social Marketing, University of Stirling, Stirling FK9 4LA, Scotland. Tel: (+44) 01786  
13  
14 466456. Email: [c.s.moodie@stir.ac.uk](mailto:c.s.moodie@stir.ac.uk)  
15  
16

17  
18 Authors: Crawford Moodie, Anne Marie Mackintosh  
19  
20

21  
22  
23 Author affiliations: Centre for Tobacco Control Research, Institute for Social Marketing,  
24  
25 University of Stirling, Stirling FK9 4LA, Scotland  
26  
27

28  
29 Running title: Young women smokers' response to plain packaging  
30  
31

32  
33  
34 Keywords: Tobacco, plain packaging, young adults  
35  
36

37  
38 Word count: 4,696  
39  
40  
41  
42  
43  
44  
45  
46  
47  
48  
49  
50  
51  
52  
53  
54  
55  
56  
57  
58  
59  
60



1  
2  
3 **Young adult women smokers' response to using plain cigarette packaging: A**  
4  
5 **naturalistic approach**  
6  
7  
8

9  
10 **Abstract**

11 **Objectives:** To explore young adult women smokers' cognitive and emotional response to  
12 using dark brown 'plain' cigarette packs in natural settings and whether plain packaging is  
13 associated with any short-term change in smoking behaviour.  
14  
15

16 **Design:** A naturalistic approach. Participants used plain cigarette packs provided to them for  
17 one week and their own fully branded packs for one week, but otherwise smoked and  
18 socialised as normal. Participants completed questionnaires twice a week.  
19  
20  
21  
22

23 **Setting:** The six most populated cities and towns in Scotland.  
24  
25

26 **Participants:** 301 young women smokers were recruited, with a final sample of 187 (62.1%).  
27 To meet the inclusion criteria women had to be between the ages of 18 and 35, daily cigarette  
28 smokers, and provide a breath sample to confirm smoking status.  
29  
30  
31  
32

33 **Primary and secondary outcome measures:** Pack perceptions and feelings, feelings about  
34 smoking, salience and perceptions of health warnings, and avoidant and cessation behaviours.  
35  
36  
37

38 **Results:** In comparison to branded packaging, plain packaging was associated with more  
39 negative perceptions and feelings about the pack and about smoking ( $p < 0.001$ ). No  
40 significant overall differences in salience, seriousness or believability of health warnings  
41 were found between the pack types, but participants reported looking more closely at the  
42 warnings on plain packs and also thinking more about what the warnings were telling them  
43 ( $p < 0.001$ ). Participants reported being more likely to engage in avoidant behaviours, such as  
44 hiding or covering the pack ( $p < 0.001$ ), and cessation behaviours, such as foregoing cigarettes  
45 ( $p < 0.05$ ), smoking less around others ( $p < 0.001$ ), thinking about quitting ( $p < 0.001$ ) and  
46  
47  
48  
49  
50  
51  
52  
53  
54  
55  
56  
57  
58  
59  
60

1  
2  
3 reduced consumption ( $p<0.05$ ), when using the plain packs. Results did not differ by  
4  
5 dependence level or socio-economic status.  
6

7 **Conclusions:** No research design can capture the true impacts of plain packaging prior to its  
8  
9 introduction, but this study suggests that plain packaging may help to reduce cigarette  
10  
11 consumption and encourage cessation in the short-term.  
12  
13

14  
15  
16  
17  
18  
19  
20  
21  
22  
23  
24  
25  
26  
27  
28  
29  
30  
31  
32  
33  
34  
35  
36  
37  
38  
39  
40  
41  
42  
43  
44  
45  
46  
47  
48  
49  
50  
51  
52  
53  
54  
55  
56  
57  
58  
59  
60

For peer review only

## ARTICLE SUMMARY

### Article focus

- How young adult women smokers respond to using plain cigarette packaging, in comparison to fully branded cigarette packaging. We explored the impact of plain packaging on short-term smoking related behaviour

### Key messages

- Plain packaging was associated with lower ratings of enjoyment and satisfaction of smoking in comparison with fully branded packaging
- Participants reported looking more closely at the health warnings on plain packs and also thinking more about what the warnings were telling them
- Plain packaging, in comparison with fully branded packaging, was associated with forgoing cigarettes, smoking less around others, increased thoughts of cessation and reduced consumption

### Strengths and limitations

- The main strength of the study is that it allows an insight into how smokers respond to plain packaging before it has been introduced
- The main limitations are the novelty of plain packaging and reliance on self-reported smoking behaviour

## Introduction

At the annual meeting of the Canadian Medical Association in 1986 it was proposed that all tobacco products should come in 'plain' brown standardised packs in order to minimise their attractiveness.<sup>1</sup> Approximately a quarter of a century on and plain tobacco packaging was fully implemented in Australia, for the first time, in December 2012. Prior to this, consultations on plain packaging ended in New Zealand in October and in the United Kingdom (UK) in August 2012. What the actual impacts of plain packaging will be, if any, remains to be seen however. A recent systematic review of the plain packaging literature, with 37 included studies, suggests that plain packaging may have a number of potential public health benefits, including: 1) reducing the appeal of the packaging and of cigarettes, 2) increasing the salience, believability and seriousness of the health warnings, although this was influenced by the type (pictorial or text), size and strength of the warnings used, and 3) increasing perceptions of harm, although this was dependent upon the colour of the plain pack, with darker coloured plain packs typically perceived as more harmful, and lighter coloured plain packs less harmful, than fully branded cigarette packs.<sup>2</sup>

One of the longstanding criticisms of the literature is that existing research typically involves gauging consumer response to plain packaging following brief exposure in a controlled environment and, as a result, fails to capture how consumers would react to and use plain packs over time in naturalistic settings. To date only one study has attempted a real world test of plain packaging. This study used a design which involved young adult men and women smokers in Glasgow (Scotland) transferring cigarettes from their own packs into plain packs provided and using these packs instead of their own packs for two weeks, and their own packs for two weeks.<sup>3</sup> Participants completed a questionnaire twice a week throughout the study to allow for comparisons to be made between the plain packs and their own packs. Pack

1  
2  
3 perceptions and feelings, and feelings about smoking, were more negative for plain packs,  
4  
5 and participants were more likely to report avoidant behaviours (e.g. covering the pack) and  
6  
7 cessation related behaviours (e.g. thinking about quitting) when using the plain packs. Post-  
8  
9 study interviews were conducted with a sub-sample of participants (N=18) to explore their  
10  
11 experiences of using the brown (plain) packs. In the post-study interviews women were more  
12  
13 likely than men to report avoidant behaviour when using the plain packs, and only women  
14  
15 reported reduced consumption when using plain packs. The pilot nature of this study,  
16  
17 recruitment within a single city, low retention rate (34%) and relatively small final sample  
18  
19 (N=48) means that further research is needed to test these findings.  
20  
21  
22  
23  
24

25 We aimed to extend this previous study by following the same approach but with a larger and  
26  
27 more nationally distributed sample of young adult women smokers, who appeared to be more  
28  
29 influenced by pack design than men in the pilot study. While high rates of smoking among  
30  
31 women tend to be the norm in most of Europe, with a prevalence of 20% or more in all but  
32  
33 four of EU member countries (Italy, Portugal, Slovakia and Sweden), this contrasts sharply  
34  
35 with much of the rest of the world.<sup>4</sup> Prevalence of smoking among women is less than 20% in  
36  
37 the Middle East, North and Central America and Asia (excluding Lebanon and Nepal), and  
38  
39 less than 10% in Africa, where figures are available.<sup>4</sup> In the UK smoking prevalence among  
40  
41 women is currently 20% and in long-term decline, but prevalence is declining at a slower rate  
42  
43 than for men and remains particularly high for young adult women, with 25% of 25-34 year  
44  
45 old women and 30% of 20-24 year old women smokers.<sup>5</sup>  
46  
47  
48  
49  
50

51 The high smoking rates among young women in the UK represents a significant future  
52  
53 burden of both mortality and morbidity should this trend not be reversed. With a growing  
54  
55 number of slim, elegant cigarette packs targeted at young women being brought to market in  
56  
57  
58  
59  
60

1  
2  
3 the UK and elsewhere within the last five years, and given that the aesthetic appeal of  
4  
5 cigarette packaging appears to be more important for young women than for young men,<sup>3,6,7,8</sup>  
6  
7 plain packaging may have a role to play in reducing the high rates of smoking among young  
8  
9 women. This study explored young women's experiences of using plain cigarette packaging  
10  
11 as they went about their everyday lives.  
12  
13

## 14 15 16 **Methods**

### 17 *Design and sample*

18  
19  
20 Between June 2011 and March 2012 young adult women smokers (N=301) were recruited  
21  
22 from eight postcode sectors from within the six most populated towns and cities in Scotland  
23  
24 (Glasgow, Edinburgh, Aberdeen, Dundee, Paisley, East Kilbride) using random location  
25  
26 quota sampling. The postcode sectors were randomly selected, stratified by DEPCAT score,  
27  
28 which is a measure of multiple deprivation, to ensure coverage of a range of socio-economic  
29  
30 backgrounds. Within each postcode sector, market recruiters were instructed to recruit either  
31  
32 six or seven participants, using the door knock method, according to quota controls on age  
33  
34 (18-24 / 25-35) and daily consumption (light, moderate smokers were defined as those  
35  
36 smoking 14 cigarettes a day or less / heavy smokers as those smoking 15 cigarettes a day or  
37  
38 more).  
39  
40  
41  
42  
43  
44

45  
46 The market recruiters, who were briefed about the study protocol but blind to the purpose of  
47  
48 the study, informed all potential participants that the study was concerned with smokers'  
49  
50 opinions of cigarette packaging. If individuals were willing to participate and available for  
51  
52 the duration of the study, they were asked to complete a recruitment questionnaire, which  
53  
54 included the Fagerström Test for Nicotine Dependence<sup>9</sup> and questions regarding brand  
55  
56 variant smoked, risk perceptions and cessation behaviour (e.g. motivation to quit, attempts to  
57  
58  
59  
60

1  
2  
3 quit). To ensure only smokers were recruited participants were asked to provide a breath  
4  
5 sample using a piCO<sup>+</sup>™ Carbon Monoxide monitor (Bedfont Scientific) and also an empty  
6  
7 cigarette pack; in the four instances where a participant only had a full pack, recruiters took a  
8  
9 photo of their pack and texted this to a member of the research team. Ethics approval was  
10  
11 obtained from the ethics committee of the Marketing Department at the University of Stirling.  
12  
13 Participants provided informed consent before taking part.  
14  
15

### 16 17 18 *Materials and procedure* 19

20  
21 Participants were informed about the study protocol by market recruiters and, if they gave  
22  
23 consent, were provided with a ‘completion’ pack. Each completion pack included seven  
24  
25 brown (plain) cigarette packs. These brown packs were only suitable for participants who  
26  
27 smoked King Size cigarettes, as was the case in a pilot study using the same approach.<sup>3</sup> As  
28  
29 nine of the top ten selling cigarette brand variants in the UK come in King Size packs most  
30  
31 smokers would have been eligible for study inclusion. However, as all of the top 25 selling  
32  
33 cigarette brand variants in the UK come in either King Size or Superkings packs,<sup>10</sup> which are  
34  
35 slightly bigger than the standard King Size pack, market recruiters were given a box of  
36  
37 Superkings plain packs and instructed to use these where appropriate. This involved replacing  
38  
39 the seven King Size brown packs within the completion pack with seven Superkings brown  
40  
41 packs if an individual smoked a Superkings brand or other longer cigarettes, such as Slims or  
42  
43 Superslims. The plain packs were otherwise identical, with a fictitious brand name Kerrods,  
44  
45 to prevent copyright breach, and all relevant legal markings and a barcode. The completion  
46  
47 packs also included five numbered questionnaires, labelled by day and date, and a timetable  
48  
49 explaining when to use their own packs and the Kerrods packs and when to complete and  
50  
51 return each of the five questionnaires.  
52  
53  
54  
55  
56  
57  
58  
59  
60

1  
2  
3 The study, which always started on a Monday, ran for two weeks. Participants were  
4 instructed to transfer cigarettes from their own packs into the Kerrods packs supplied to them  
5 and use these for one week of the study, and their own packs for the other week of the study.  
6  
7 Ordering was randomised so that half the sample used the plain pack in the first week of the  
8 study and half in the second week. Participants were instructed to retain and re-use the  
9 Kerrods packs if they smoked more than 20 cigarettes in a day. In the UK cigarette packs  
10 contain one of two text health warnings on the front ('Smoking kills' or 'Smoking seriously  
11 harms you and others around you') and one of fourteen 'pictorial' warnings on the reverse  
12 panel, although three are in fact text warnings as they do not display a picture, photo,  
13 pictogram or symbol. All Kerrods packs had the same warning on the pack front (Smoking  
14 kills) and one of three 'pictorial' warnings on the reverse panel showing either; a set of  
15 healthy and diseased lungs, smoke in a child's face or a text warning about seeking help (see  
16 Figure 1). Past research has found these three warnings to have high (lungs), medium (smoke  
17 in child's face) and low salience (seeking help) among smokers.<sup>11</sup> Each completion pack  
18 contained at least two packs with each of the three warnings. We included packs with  
19 different health warnings to reflect the types of warnings that smokers receive on packs and  
20 prevent all packs featuring only warnings found to have high or low salience, as this could  
21 potentially influence response to the warning items.  
22  
23  
24  
25  
26  
27  
28  
29  
30  
31  
32  
33  
34  
35  
36  
37  
38  
39  
40  
41  
42  
43  
44

45 Figure 1 here  
46  
47  
48

49 Participants were instructed to complete five questionnaires during the two weeks of the  
50 study. Questionnaires 1 and 2 were to be completed and returned, via pre-addressed  
51 envelopes or by email, on the Thursday and Sunday respectively of the first week.  
52  
53  
54

55 Questionnaires 3 and 4 were to be completed and returned on the Thursday and Sunday  
56  
57  
58  
59  
60



1  
2  
3 respectively in the second week. The first four questionnaires, which were identical (see  
4 Appendix 1), resulted in two questionnaires relating to their experience of the plain packs and  
5 two relating to their own pack. Questionnaire 5 included the same questions as the pre-study  
6 questionnaire about risk perceptions and cessation behaviour, and was to be completed and  
7 returned on the same day as questionnaire 4 to reduce participant burden. This is not included  
8 in this analysis.  
9  
10  
11  
12  
13  
14  
15

16  
17  
18 Although the day and date each questionnaire was to be completed and returned was  
19 highlighted on the front cover and specified in the timetable, in an attempt to increase study  
20 compliance the research team sent a text message to each participant the day before study  
21 onset, always a Sunday. The text reminded participants: 1) that the study would start the next  
22 day, 2) what packs they were to use for the coming week, and 3) to complete questionnaire 1  
23 the following Thursday (the day and date was given for clarity). A second text message was  
24 sent the following Sunday to remind participants to complete and return questionnaire 2 that  
25 day, and on which packs to use for the following week. A third and final text was sent the  
26 subsequent Sunday, reminding participants to complete and return questionnaires 4 and 5 that  
27 day. Participants were also sent a reminder letter during the first week of the study and an  
28 email was sent every Thursday and Sunday morning to participants who had provided an  
29 email address as an additional reminder to complete and return the questionnaires. To  
30 encourage the return of all the questionnaires participants were informed that on top of the  
31 participation fee (£15.00) they would receive an incrementally greater payment for each  
32 questionnaire returned; £2.50 if they returned one questionnaire, £7.00 if they returned two  
33 questionnaires, £12.00 for three, £20.00 for four and £30.00 for all five. Participants were  
34 provided with an information sheet to remind them of this incremental payment plan.  
35  
36  
37  
38  
39  
40  
41  
42  
43  
44  
45  
46  
47  
48  
49  
50  
51  
52  
53  
54  
55  
56  
57  
58  
59  
60

### Analysis

Prior to analysis, some items were recoded to ensure the same direction of coding and thus facilitate creation and interpretation of composite variables. Composite scores were derived for pack perceptions, pack feelings, feelings about smoking, and response to warnings, by summing the individual items within each and then rescaling to a five-point scale. Cronbach's alpha was acceptable for each, all above 0.70 with the exception of the overall health warning response for own pack which had an alpha of 0.65, thus supporting the decision to create composite scores for each measure and for each pack type.

Ratings between fully branded and Kerrods plain packs were compared. Ratings collected on the Thursday questionnaires are referred to as 'midweek' and those collected on the following Sunday referred to as 'weekend'. For each analysis, midweek ratings of the Kerrods pack were compared with midweek ratings of their own pack and weekend ratings of the Kerrods pack were compared with weekend ratings of their own pack. Paired t-tests were used to produce mean scores for the Kerrods pack relative to mean scores for their own pack. Given the ordinal nature of the five-point scales, the Wilcoxon Signed Rank test was used to test for differences between ratings of the Kerrods pack versus participant's own packs. As the data on avoidant/cessation behaviours were binary (yes/no) the McNemar test was used to test for differences in response to the Kerrods pack versus their own pack. The number of avoidant/cessation behaviours associated with each pack was also counted and paired t-tests were used to test for differences in the mean number of actions taken with the Kerrods pack versus their own pack. Similarly, paired t-tests were used to test for differences in mean reported daily consumption when using the Kerrods pack versus their own pack. Comparisons across time were also made by comparing the midweek composite scores for the Kerrods pack versus the weekend composite scores for the Kerrods pack and comparing

1  
2  
3 the midweek composite scores for their own pack versus the weekend composite scores for  
4 their own pack. The Wilcoxon Signed Rank test was used to test for differences, across time,  
5 in the composite scores. Paired t-tests were used to test for differences between midweek and  
6 weekend reports on the number of avoidant/cessation behaviours and reported daily  
7 consumption with each pack  
8  
9  
10  
11  
12

13  
14  
15  
16 Given the paucity of plain packaging research exploring sub-group differences,<sup>2</sup> analyses of  
17 the composite scores were also run separately to explore whether the results were consistent  
18 by age group (18-24, 25-35), social grade (ABC1, C2DE) and dependence level (light,  
19 moderate/ high). Social grade, based on occupation, was classified in accordance with the six  
20 groups (A – upper middle class; B – middle class; C1 – lower middle class; C2 – skilled  
21 working class; D – working class and E – those at lowest level of subsistence) used by the  
22 British National Readership Survey. These six groups were combined to form two groups to  
23 enable broad comparison between middle class (ABC1) and working class (C2DE)  
24 participants. Dependence level was measured via the Fagerström Test for Nicotine  
25 Dependence,<sup>9</sup> with those scoring between 0-5 categorised as having light/moderate  
26 dependence and those scoring 6-10 high dependence levels.  
27  
28  
29  
30  
31  
32  
33  
34  
35  
36  
37  
38  
39  
40  
41  
42

## 43 RESULTS

44  
45 Of the 301 participants recruited, 54 (17.9%) were non-completers, who failed to participate  
46 at all after completing the pre-study questionnaire, 60 (19.9%) were partial completers, who  
47 failed to return all the questionnaires or reported using the incorrect pack (e.g. they used their  
48 own packs when they were meant to be using the Kerrods packs), and 187 (62.1%) were full  
49 completers, who returned all the questionnaires and reported using the correct packs. Results  
50 presented in this paper are based on the full completers. The average age of the full  
51  
52  
53  
54  
55  
56  
57  
58  
59  
60

1  
2  
3 completers was 27.14 years (sd 5.63); 84 (44.9%) were from social grade ABC1 and 103  
4  
5 (55.1%) from social grade C2DE; 96 (51.3%) had light/moderate dependence and 91 (48.7%)  
6  
7 high dependence; average daily cigarette consumption was 17.28 (sd 7.19); 33 (17.6%) had  
8  
9 given up for one day or more in the previous month and 129 (69.0%) indicated that they  
10  
11 would like to or really wanted to give up smoking. There was no significant difference in  
12  
13 terms of age, dependence level or motivation to quit between those included in the analyses  
14  
15 and those excluded (non-completers and partial completers). However, participants from  
16  
17 social group ABC1 were more likely to complete the study fully (71.2% of ABC1s were full  
18  
19 completers v 56.6% of C2DEs,  $p<0.05$ ) as were participants with a past month quit attempt of  
20  
21 one day or more (78.6% of those with a past month quit attempt completed the study fully v  
22  
23 59.7% of those with no past month quit attempt,  $p<0.05$ ).  
24  
25  
26  
27  
28  
29

### 30 **Pack Perceptions**

31  
32 On average, participants rated Kerrods negatively on all pack perceptions (not stylish,  
33  
34 unfashionable, cheap, uncool, unattractive, poor quality, unappealing), with mean scores  
35  
36 ranging from 1.55 to 2.37; lower scores indicating more negative perceptions (see Table 1a).  
37  
38 For their own packs the higher mean scores, ranging from 2.91 to 3.69, indicated more  
39  
40 positive pack perceptions. For the overall pack perception score (all items combined),  
41  
42 participants rated the Kerrods pack more negatively than their own pack, and this did not vary  
43  
44 across time for either pack. Results were consistent by age group, social grade and  
45  
46 dependence level.  
47  
48  
49  
50  
51

52 Table 1 here  
53  
54  
55

### 56 **Pack Feelings**

57  
58  
59  
60

1  
2  
3 On average, participants reported more negative feelings (embarrassed, ashamed, unaccepted)  
4 about using the Kerrods pack, relative to their own pack (see Table 1b). For the Kerrods  
5 pack, mean scores ranged from 2.54 to 3.10, whereas mean scores for their own pack ranged  
6 from 3.26 to 4.08. For both their own packs and the Kerrods pack, overall pack feelings were  
7 rated more negatively at the weekend compared with midweek ( $p<0.001$ ). Results were  
8 consistent by age group, social grade and dependence level.  
9  
10  
11  
12  
13  
14  
15  
16  
17

### 18 **Feelings about smoking**

19  
20 Participants reported more negative feelings about smoking from the Kerrods pack, in terms  
21 of enjoyment, satisfaction and feeling good, relative to their own pack (see Table 1c). For the  
22 Kerrods pack, mean scores ranged from 2.68 to 2.99, while mean scores for their own packs  
23 ranged from 3.13 to 3.52. Overall ratings for their own packs did not vary across time. For  
24 the Kerrods pack, overall feelings about smoking were rated more negatively at the weekend  
25 compared with midweek ( $p<0.05$ ). Results were consistent across age group, social grade and  
26 dependence level.  
27  
28  
29  
30  
31  
32  
33  
34  
35  
36  
37

### 38 **Health warnings**

#### 39 *Salience, seriousness and believability*

40  
41 For both pack types, the on-pack health warnings were rated as being noticeable (mean scores  
42 3.41 to 3.44), serious (3.83 to 3.94) and believable (3.91 to 4.10), see Table 2. At the  
43 weekend only, warnings on the Kerrods pack were rated as more believable relative to  
44 participants' own packs. However, overall ratings of the warnings did not differ between the  
45 packs, and did not vary across time for either pack. Findings were consistent across age,  
46 social grade and dependence level.  
47  
48  
49  
50  
51  
52  
53  
54  
55  
56  
57  
58  
59  
60

1  
2  
3 Table 2 here  
4  
5  
6

7  
8 *Attention and depth of processing*

9  
10 Warnings were rated as being read more closely on the Kerrods pack (mean scores 2.97 to  
11 3.00) than on their own packs (mean scores 2.28 to 2.58), and thought about more on the  
12 Kerrods pack (mean scores 3.02 to 3.16) relative to participants' own packs (mean scores  
13 2.52 to 2.80). The overall results were consistent for the age and dependence level sub-  
14 groups. However, at the weekend, participants from social grade C2DE did not show any  
15 significant difference, between Kerrods and own pack, in overall warning action response.  
16  
17 While there was no difference in the overall Kerrods ratings across time, the own pack ratings  
18 were stronger at the weekend compared with midweek ( $p<0.001$ ).  
19  
20  
21  
22  
23  
24  
25  
26  
27  
28

29  
30 **Avoidant behaviour/Behaviour change**

31  
32 Participants always indicated greater occurrence of the following actions when using the  
33 Kerrods packs: keeping the pack out of sight; covering the pack; foregoing cigarettes;  
34 smoking less around others; thinking about quitting (Table 3). In addition, when using the  
35 Kerrods pack, participants were more likely to stub out a cigarette, although only  
36 significantly so at the weekend. They were also more likely to want to quit smoking, when  
37 using the Kerrods pack, though only significantly so at midweek. On average, participants  
38 reported a higher number of behaviour changes or avoidant behaviours when using the  
39 Kerrods pack (1.88 and 2.29 midweek and weekend respectively) compared with their own  
40 pack (0.84 and 1.12 midweek and weekend respectively). This result was consistent by age,  
41 social grade and dependence level. For each pack type, the number of behaviour  
42 changes/avoidant behaviours increased at the weekend ( $p<0.001$  for Kerrods and  $p<0.01$  for  
43 own pack).  
44  
45  
46  
47  
48  
49  
50  
51  
52  
53  
54  
55  
56  
57  
58  
59  
60

1  
2  
3  
4  
5 Table 3 here  
6  
7  
8

9  
10 Reported consumption was always lower with the Kerrods pack compared with participants'  
11 own pack. Midweek average daily consumption was 14.9 when using Kerrods and 15.5 when  
12 using their own pack ( $p<0.05$ ), with weekend average daily consumption 15.7 when using  
13 Kerrods and 16.7 when using their own pack ( $p<0.01$ ). The pattern of lower consumption,  
14 when using the Kerrods pack versus their own pack, was observed within each of the age,  
15 social grade and dependence level sub-groups, but did not always reach significance.  
16  
17 Consumption was higher at the weekend for each pack ( $p<0.05$  for Kerrods and  $p<0.01$  for  
18 own pack).  
19  
20  
21  
22  
23  
24  
25  
26  
27  
28

## 29 **Discussion**

30  
31 For young adult women smokers, a key target group for public health, the use of dark brown  
32 (plain) cigarette packs in naturalistic settings was associated with more negative perceptions  
33 and feelings about the packaging and about smoking than for their own fully branded packs.  
34  
35 As with past research in the UK the base colour of the plain packs, a faecal brown, was  
36 perceived negatively.<sup>3,7,12,13</sup> Plain packs were also associated with more negative feelings  
37 about the pack, in terms of embarrassment and shame, lower ratings of enjoyment and  
38 satisfaction of smoking, and increased avoidant (hiding and covering the pack) and cessation  
39 related smoking behaviours (stopping out cigarettes early, forgoing cigarettes and reduced  
40 consumption). These findings closely reflect those of a pilot study using the same approach.<sup>3</sup>  
41  
42 The key differences to emerge between the studies were that in the pilot study stopping out  
43 cigarettes early when using the plain packs was never significant and forgoing cigarettes  
44  
45  
46  
47  
48  
49  
50  
51  
52  
53  
54  
55  
56  
57  
58  
59  
60

1  
2  
3 when using plain packs was not always significant. As level of consumption was not  
4  
5 measured in the pilot study questionnaires no comparisons can be made.  
6  
7

### 8 9 **Study strengths**

10 The study permits an insight into how smokers respond to plain packaging in natural settings  
11  
12 before it has been introduced. It is difficult to envisage an alternative approach which would  
13  
14 allow smoking related behaviours to be captured, such as stubbing out cigarettes early,  
15  
16 forgoing cigarettes and reduced consumption. Similarly, as the study did not involve forced  
17  
18 exposure to packaging it more accurately reflects how smokers respond to the on-pack health  
19  
20 warnings, in respect to the attention they are given, how they are perceived and also how  
21  
22 deeply they are processed. There were no significant overall differences in ratings of warning  
23  
24 salience, seriousness and believability, consistent with a pilot naturalistic study and two  
25  
26 recent eye-tracking studies from the UK.<sup>3,14,15</sup> Warning design may, in part, help explain  
27  
28 these findings. The positioning of images only on the reverse panel of packaging is  
29  
30 inconsistent with the Guidelines for Article 11 of the Framework Convention on Tobacco  
31  
32 Control<sup>16</sup> and best international practice. Indeed, very few countries outside of Europe that  
33  
34 require pictorial warnings to be displayed on cigarette packs, such as Argentina and  
35  
36 Venezuela, fail to use pictorial warnings on the pack front. Including pictorial warnings only  
37  
38 on the reverse panel of packaging has been found to reduce warning effectiveness.<sup>2</sup> Similarly,  
39  
40 lack of rotation is likely to have increased wear-out; although images appeared on the reverse  
41  
42 panel of packs in the UK in 2008 to support the warning text, the text has been on packs since  
43  
44 2003. Warnings on plain packs were read more closely and thought about more than on fully  
45  
46 branded packs however. That warnings on plain packs were attended to more closely and  
47  
48 more deeply processed, which was not assessed in the pilot study, advances our  
49  
50 understanding of the possible real-world impacts of plain packaging.  
51  
52  
53  
54  
55  
56  
57  
58  
59  
60



1  
2  
3  
4  
5 It is not only cessation related behaviours such as stubbing out or forgoing cigarettes which  
6  
7 can be captured with such an approach, but also behaviours such as smoking less around  
8  
9 other people. The UK Department of Health speculate that a potential benefit of plain  
10  
11 packaging could be to reduce exposure to second-hand smoke (SHS) from reduced rates of  
12  
13 smoking,<sup>17</sup> which would reduce the high annual direct costs to the NHS incurred by treating  
14  
15 illness related to exposure to SHS.<sup>18</sup> That young women reported smoking less around others  
16  
17 when using the plain packs suggests that the appearance of the pack, and how it makes some  
18  
19 young women feel and think about smoking, may in itself lead to lower exposure to SHS. The  
20  
21 Department of Health also suggested that future research consider consumer response to plain  
22  
23 packaging across socioeconomic groups,<sup>17</sup> which is somewhat surprisingly lacking in the  
24  
25 existing literature.<sup>2</sup> We found no significant differences across income group, or indeed by  
26  
27 age or dependence level. While this suggests that plain packaging could potentially help  
28  
29 benefit all young women, caution should be exercised as the sample size did not permit a  
30  
31 more detailed breakdown of socio-economic status or dependence.  
32  
33  
34  
35  
36  
37

### 38 **Limitations**

39  
40 The study has a number of limitations. The reliance on self-reporting, both in terms of  
41  
42 reported behaviour change and the use of the Kerrods packs, is a potential limitation. Given  
43  
44 the high level of participant involvement and the nature of the research it is difficult to see a  
45  
46 viable alternative. One way would have been to provide participants with their brand of  
47  
48 cigarettes already within the plain packs, which would eliminate the need for cigarettes to be  
49  
50 transferred from one pack into another, but ethical concerns prohibited us from doing so.  
51  
52 While the generic brand name (Kerrods), used to avoid breach of copyright, was intended to  
53  
54 be neutral and has previously been found to have no positive or negative associations among  
55  
56  
57  
58  
59  
60

1  
2  
3 smokers,<sup>7</sup> it is nevertheless possible that this may have had an impact on participant's  
4 perceptions of plain packaging. The findings cannot be generalised to all young women  
5 smokers and provides no insight into the impact of plain packaging on older women smokers,  
6 male smokers or non-smokers, although the exclusive focus on young women was taken  
7 given high smoking prevalence among this group. It is also possible that participants may  
8 respond differently if only plain packs were available on the legitimate market. Clearly, the  
9 true impacts of standardising the appearance of all legitimate cigarette packs on the market  
10 remain unclear. Research in Australia can help shed further light on the impacts of plain  
11 packaging. However, given that Australia has strong tobacco control, the largest on-pack  
12 warnings in the world and low prevalence of nicotine use, further research in Europe and  
13 elsewhere using approaches that more closely approximate what consumers experience when  
14 using plain packs in naturalistic settings is required.  
15  
16  
17  
18  
19  
20  
21  
22  
23  
24  
25  
26  
27  
28  
29  
30  
31

### 32 **Implications for policy makers and clinicians**

33  
34 As a number of governments consider the merits of plain packaging as a policy measure these  
35 findings may help inform the decision making process. It is ultimately for policy makers to  
36 assess the potential value of plain packaging as part of a comprehensive suite of tobacco  
37 control measures aimed at reducing consumption and prevalence, but the collective evidence  
38 generally provides support for plain packaging, irrespective of design, location and sample.<sup>2</sup>  
39  
40 This study extends this growing body of evidence and is the first to find that smokers were  
41 more likely to stub out cigarettes early and reduce consumption when using plain packs.  
42  
43 These findings are relevant to the National Institute for Health and Clinical Excellence  
44 (NICE) draft guidelines on harm-reduction approaches to smoking, published in October  
45 2012,<sup>19</sup> which positions quitting as the target but points to potential health benefits of  
46 consuming fewer cigarettes, or less of each cigarette. Further research that provides greater  
47  
48  
49  
50  
51  
52  
53  
54  
55  
56  
57  
58  
59  
60

1  
2  
3 insight into the impacts of plain packaging on smoking behaviour, and more broadly what the  
4 health benefits, if any, of reduced consumption and intake are,<sup>19</sup> would be of value. However,  
5 the present findings contribute to the harm-reduction debate and suggest that plain packaging  
6 may have a role to play in this proposed harm-reduction approach.  
7  
8  
9  
10

11  
12  
13  
14 The study also points to opportunities for clinicians. While plain packaging was found to  
15 increase thoughts of quitting, even when using their own packs between a quarter and a third  
16 of young women reported thinking about and wanting to quit. Smoking rates are higher  
17 among young women than for older women and for males of any age,<sup>5</sup> and prevalence among  
18 20-24 year olds has declined at a slower rate than for any other age group in the last quarter  
19 of a century, from 35% in 1984 to 30% in 2010.<sup>5</sup> As such, the desire to change among a  
20 significant percentage of such a key target group suggests that young women may benefit  
21 from intervention by clinicians or health care professionals.  
22  
23  
24  
25  
26  
27  
28  
29  
30  
31  
32

### 33 34 **Notes**

35  
36 Acknowledgements: Diane Dixon for her help with co-ordinating the study and data input,  
37 and Bedfont Scientific for providing piCO<sup>+</sup>™ Carbon Monoxide monitors.  
38  
39  
40  
41  
42

43 Contributors: CM designed data collection tools, monitored data collection, cleaned the data,  
44 and drafted and revised the paper. CM is guarantor. AMM designed data collection tools,  
45 analysed the data, and drafted and revised the paper.  
46  
47  
48  
49  
50

51 Funding: This work was supported by Cancer Research UK grant number A13467. The  
52 funders had no role in study design; in the collection, analysis, and interpretation of data; in  
53  
54  
55  
56  
57  
58  
59  
60

1  
2  
3 the writing of the report; and in the decision to submit the article for publication. The  
4  
5 researchers are independent from the funders.  
6  
7

8  
9  
10 Competing interests: None.  
11

12  
13  
14 Ethical approval: The study obtained ethics approval from the ethics committee of the  
15  
16 Marketing Department at the University of Stirling. Participants provided informed consent  
17  
18 before taking part.  
19

20  
21  
22  
23 Data sharing: No additional data available.  
24  
25  
26  
27  
28  
29  
30  
31  
32  
33  
34  
35  
36  
37  
38  
39  
40  
41  
42  
43  
44  
45  
46  
47  
48  
49  
50  
51  
52  
53  
54  
55  
56  
57  
58  
59  
60

## References

1. Lee B. Sell tobacco in no-frills wrappers, urge doctors. *The Journal* 1986;10;5.
2. Moodie C, Stead M, Bauld L, et al. *Plain tobacco packaging: A systematic review*. Stirling: Centre for Tobacco Control Research, University of Stirling, 2012.
3. Moodie C, Hastings GB, Mackintosh AM, et al. Young adult smokers' perceptions of plain packaging: A pilot naturalistic study. *Tob Control* 2011;20:367-73.
4. Eriksen M, Mackay J, Ross H. *The tobacco atlas (4<sup>th</sup> Edition)*. Atlanta, Georgia: American Cancer Society, 2012.
5. The NHS Information Centre. *Statistics on Smoking: England, 2012*. London: The Health and Social Care Information Centre, 2012.
6. Doxey J, Hammond D. Deadly in pink: The impact of female-oriented cigarette packaging among young women. *Tob Control* 2011;20:353-60.
7. Moodie C, Ford A. Young adult smokers' perceptions of cigarette pack innovation, pack colour and plain packaging. *Australasian Market J* 2011;19:174-80.
8. Carpenter CM, Wayne GF, Connolly GN. Designing cigarettes for women: New findings from the tobacco industry documents. *Addiction* 2005;100:837-51.

- 1  
2  
3 9. Heatherton TF, Kozlowski LT, Frecker RC, et al. The Fagerstrom Test for Nicotine  
4  
5 Dependence: A revision of the Fagerstrom Tolerance Questionnaire. *Br J Addictions*  
6  
7 1991;86:1119-27.  
8  
9  
10  
11  
12 10. Hegarty R. Do dark times lie ahead? *The Grocer*, 18 February 2012.  
13  
14  
15  
16 11. Wardle H, Pickup D, Lee L, et al. *Evaluating the impact of picture health warnings on*  
17  
18 *cigarette packets*. London: Public Health Research Consortium, 2012.  
19  
20  
21  
22  
23 12. Moodie C, Ford A, Mackintosh AM, et al. Young people's perceptions of cigarette  
24  
25 packaging and plain packaging: An online survey. *Nic Tob Res* 2012;14:98-105.  
26  
27  
28  
29  
30 13. Centre for Tobacco Control Research. *The packaging of tobacco products*. Stirling:  
31  
32 Centre for Tobacco Control Research, University of Stirling; 2012.  
33  
34  
35  
36 14. Munafo M, Roberts N, Bauld L, et al. Plain packaging increases visual attention to  
37  
38 health warnings on cigarette packs in non-smokers and weekly smokers but not daily  
39  
40 smokers. *Addiction* 2011;106:1505-10.  
41  
42  
43  
44  
45 15. Maynard O, Munafó M, Leonards U. Visual attention to health warnings on plain tobacco  
46  
47 packaging in adolescent smokers and non-smokers. *Addiction* 2013;108:413-9.  
48  
49  
50  
51  
52 16. World Health Organisation. *Elaboration of guidelines for implementation of Article 11 of*  
53  
54 *the Convention. Third session of the Conference of the Parties to the WHO Framework*  
55  
56 *Convention on Tobacco Control*. Durban, South Africa, 17–22 November 2008.  
57  
58  
59  
60

1  
2  
3 [http://www.who.int/fctc/guidelines/article\\_11.pdf](http://www.who.int/fctc/guidelines/article_11.pdf) (accessed 8 September 2012)  
4  
5  
6

7 17. Department of Health. *Consultation on standardised packaging of tobacco products:*  
8  
9 *Equality Impact Assessment*. London: Department of Health, 2012.  
10  
11

12  
13  
14 18. Royal College of Physicians. *Passive smoking and children*. London: Royal College of  
15  
16 Physicians, 2010.  
17  
18

19  
20 19. National Institute for Health and Clinical Excellence. *Tobacco: harm-reduction*  
21  
22 *approaches to smoking*. London: NICE, 2012.  
23  
24  
25  
26  
27  
28  
29  
30  
31  
32  
33  
34  
35  
36  
37  
38  
39  
40  
41  
42  
43  
44  
45  
46  
47  
48  
49  
50  
51  
52  
53  
54  
55  
56  
57  
58  
59  
60

**Table 1.** Mean ratings on response to Kerrods pack v Own pack for pack perceptions, pack feelings and feelings about smoking

|                                      | Midweek   |                     | Weekend   |                     |
|--------------------------------------|-----------|---------------------|-----------|---------------------|
|                                      | Kerrods   | Own                 | Kerrods   | Own                 |
|                                      | mean      | mean                | mean      | mean                |
|                                      | <i>sd</i> | <i>sd</i>           | <i>sd</i> | <i>sd</i>           |
| <b>a) Pack Perceptions (7 items)</b> |           |                     |           |                     |
| Style                                | 1.55      | 3.16 <sup>***</sup> | 1.62      | 3.23 <sup>***</sup> |
| not stylish(1)/stylish(5)            | 0.88      | 0.99                | 0.90      | 0.98                |
| Fashion                              | 2.30      | 3.07 <sup>***</sup> | 1.88      | 3.08 <sup>***</sup> |
| unfashionable(1)/fashionable(5)      | 1.53      | 1.03                | 1.22      | 1.02                |
| Cheap                                | 1.74      | 3.30 <sup>***</sup> | 1.90      | 3.37 <sup>***</sup> |
| cheap(1)/expensive(5)                | 0.99      | 1.08                | 1.02      | 1.03                |
| Cool                                 | 1.74      | 2.95 <sup>***</sup> | 1.76      | 2.91 <sup>***</sup> |
| uncool(1)/cool(5)                    | 0.87      | 0.99                | 0.89      | 0.94                |
| Attractive                           | 1.78      | 3.03 <sup>***</sup> | 1.72      | 3.07 <sup>***</sup> |
| unattractive(1)/attractive(5)        | 1.15      | 1.14                | 0.99      | 1.05                |
| Quality                              | 2.37      | 3.69 <sup>***</sup> | 2.26      | 3.64 <sup>***</sup> |
| poor quality(1)/good quality(5)      | 1.16      | 0.95                | 1.11      | 0.93                |
| Appealing                            | 1.81      | 3.19 <sup>***</sup> | 1.85      | 3.16 <sup>***</sup> |
| unappealing(1)/appealing(5)          | 1.06      | 1.08                | 1.04      | 0.97                |
| <b>Overall Pack Perceptions</b>      |           |                     |           |                     |
| Composite score                      | 1.90      | 3.19 <sup>***</sup> | 1.85      | 3.21 <sup>***</sup> |



1  
2  
3 Low score = negative

4 perceptions / High score =

5  
6  
7 positive perceptions 0.72 0.07 0.73 0.76

8  
9  
10  
11  
12 **b) Pack Feelings (3 items)**

13  
14 Embarrassment 2.70 4.08\*\*\* 2.54 3.84\*\*\*

15 embarrassed(1)/not

16  
17 embarrassed(5) 1.29 1.14 1.25 1.04

18  
19 Ashamed 3.10 4.02\*\*\* 2.71 3.72\*\*\*

20  
21 ashamed(1)/not ashamed(5) 1.26 1.12 1.18 1.08

22  
23 Acceptance 2.69 3.37\*\*\* 2.55 3.26\*\*\*

24  
25 unaccepted(1)/accepted(5) 1.02 1.07 0.95 0.99

26  
27  
28  
29  
30  
31  
32 **Overall Pack Feelings**

33  
34 Composite score 2.84 3.82\*\*\* 2.60 3.62\*\*\*

35  
36 Low score = negative perceptions

37 / High score = positive

38  
39 perceptions 1.03 0.92 0.99 0.86

40  
41  
42  
43  
44  
45 **c) Feelings about smoking**

46  
47 **(3 items)**

48  
49 Enjoyment 2.90 3.40\*\*\* 2.73 3.40\*\*\*

50 enjoyable(1)/ enjoyable(5) 0.97 0.95 0.97 0.96

51  
52 Satisfaction 2.99 3.52\*\*\* 2.83 3.41\*\*\*

53  
54 not satisfying(1)/satisfying(5) 0.99 0.93 1.00 0.98

|    |                                 |      |                     |      |                     |
|----|---------------------------------|------|---------------------|------|---------------------|
| 1  |                                 |      |                     |      |                     |
| 2  |                                 |      |                     |      |                     |
| 3  | Good                            | 2.73 | 3.13 <sup>***</sup> | 2.68 | 3.19 <sup>***</sup> |
| 4  |                                 |      |                     |      |                     |
| 5  | bad(1)/good(5)                  | 0.87 | 0.93                | 0.95 | 0.98                |
| 6  |                                 |      |                     |      |                     |
| 7  |                                 |      |                     |      |                     |
| 8  |                                 |      |                     |      |                     |
| 9  |                                 |      |                     |      |                     |
| 10 | <b>Overall Feelings Smoking</b> |      |                     |      |                     |
| 11 |                                 |      |                     |      |                     |
| 12 | Composite score                 | 2.88 | 3.36 <sup>***</sup> | 2.75 | 3.34 <sup>***</sup> |
| 13 |                                 |      |                     |      |                     |
| 14 | Low score = negative            |      |                     |      |                     |
| 15 |                                 |      |                     |      |                     |
| 16 | perceptions / High              |      |                     |      |                     |
| 17 |                                 |      |                     |      |                     |
| 18 | score = positive perceptions    | 0.82 | 0.83                | 0.89 | 0.87                |
| 19 |                                 |      |                     |      |                     |
| 20 |                                 |      |                     |      |                     |

\*\*\* p<0.001; \*\* p<0.01; \* p<0.05

**Table 2.** Mean ratings on response to Kerrods pack v Own pack for health warning salience and credibility, and attention and depth of processing

|                                   | Midweek     |             | Weekend     |             |
|-----------------------------------|-------------|-------------|-------------|-------------|
|                                   | Kerrods     | Own         | Kerrods     | Own         |
| <b>Health warnings</b>            | mean        | mean        | mean        | mean        |
| <b>(salience and credibility)</b> | <i>sd</i>   | <i>sd</i>   | <i>sd</i>   | <i>sd</i>   |
| Noticing                          | 3.44        | 3.43        | 3.41        | 3.25        |
| hardly noticeable(1)/very(5)      | <i>1.39</i> | <i>1.33</i> | <i>1.40</i> | <i>1.29</i> |
| Seriousness                       | 3.94        | 3.83        | 3.84        | 3.89        |
| not serious(1)/ serious(5)        | <i>1.12</i> | <i>1.12</i> | <i>1.26</i> | <i>1.04</i> |
| Believability                     | 4.10        | 4.08        | 4.09        | 3.91*       |
| Not believable(1)/                |             |             |             |             |
| believable(5)                     | <i>1.09</i> | <i>0.98</i> | <i>1.09</i> | <i>1.06</i> |
| <b>Overall Warning Response</b>   |             |             |             |             |
| Composite score                   | 3.92        | 3.77        | 3.77        | 3.67        |
| Low score = little, no impact /   |             |             |             |             |
| High score = high impact          | <i>0.97</i> | <i>0.93</i> | <i>1.01</i> | <i>0.88</i> |
| <b>Health warnings (attention</b> |             |             |             |             |
| <b>and depth of processing)</b>   |             |             |             |             |
| Attention                         | 3.00        | 2.28***     | 2.97        | 2.58***     |
| not looking                       |             |             |             |             |
| closely(1)/looking closely(5)     | <i>1.47</i> | <i>1.34</i> | <i>1.51</i> | <i>1.35</i> |

|                                                                                                |             |                     |             |                     |
|------------------------------------------------------------------------------------------------|-------------|---------------------|-------------|---------------------|
| Thinking about warnings                                                                        | 3.02        | 2.52 <sup>***</sup> | 3.16        | 2.80 <sup>***</sup> |
| not think about what they are<br>telling you(1)/thinking about<br>what they are telling you(5) | <i>1.41</i> | <i>1.36</i>         | <i>1.47</i> | <i>1.34</i>         |

### Overall Warning Action

#### Response

|                                                                  |             |                     |             |                     |
|------------------------------------------------------------------|-------------|---------------------|-------------|---------------------|
| Composite score                                                  | 3.00        | 2.39 <sup>***</sup> | 3.06        | 2.69 <sup>***</sup> |
| Low score = little or no<br>action / high score = high<br>action | <i>1.38</i> | <i>1.26</i>         | <i>1.42</i> | <i>1.27</i>         |

\*\*\* p<0.001; \*\* p<0.01; \* p<0.05

**Table 3:** Proportion of participants reporting avoidant behaviour or behaviour change as a result of the pack

| Behaviour change /<br>avoidant behaviour | Midweek      |          | Weekend      |          |
|------------------------------------------|--------------|----------|--------------|----------|
|                                          | Kerrods<br>% | Own<br>% | Kerrods<br>% | Own<br>% |
| Stub out cigarette                       | 10           | 5        | 17           | 10*      |
| Forego a cigarette                       | 13           | 4**      | 15           | 8*       |
| Keep pack out of sight                   | 54           | 11***    | 55           | 10***    |
| Cover pack                               | 10           | 2***     | 21           | 3***     |
| Smoke less around<br>others              | 33           | 11***    | 39           | 16***    |
| Think about quitting                     | 39           | 26***    | 46           | 34***    |
| Want to quit                             | 33           | 25*      | 37           | 32       |
| <i>Mean number of<br/>actions</i>        | 1.88         | 0.84***  | 2.29         | 1.12***  |
| <i>sd</i>                                | 1.80         | 1.36     | 2.16         | 1.61     |

\*\*\* p<0.001; \*\* p<0.01; \* p<0.05

1  
2  
3  
4  
5  
6  
7  
8  
9  
10  
11  
12  
13  
14  
15  
16  
17  
18  
19  
20  
21  
22  
23  
24  
25  
26  
27  
28  
29  
30  
31  
32  
33  
34  
35  
36  
37  
38  
39  
40  
41  
42  
43  
44  
45  
46  
47  
48  
49  
50  
51  
52  
53  
54  
55  
56  
57  
58  
59  
60

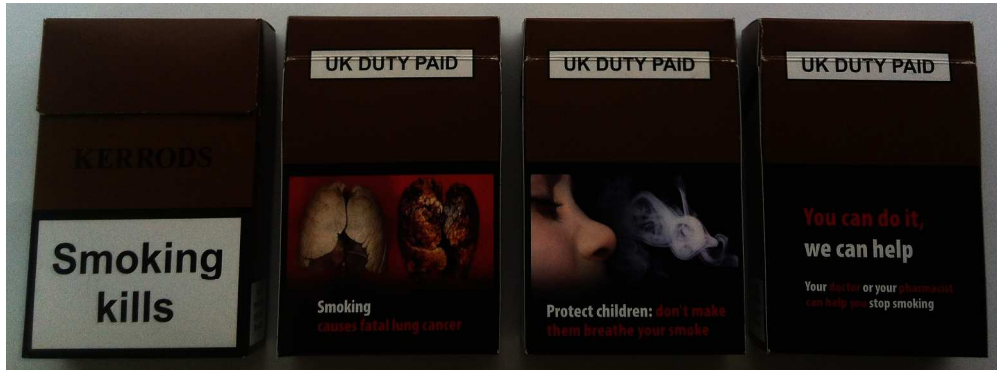

Figure 1: Brown 'plain' packs and health warnings used on the front and back of packs 245x90mm (300 x 300 DPI)

peer review only

1  
2  
3 Title: Young adult women smokers' response to using plain cigarette packaging: A  
4  
5 naturalistic approach  
6  
7  
8

9  
10 Corresponding author: Crawford Moodie, Centre for Tobacco Control Research, Institute for  
11  
12 Social Marketing, University of Stirling, Stirling FK9 4LA, Scotland. Tel: (+44) 01786  
13  
14 466456. Email: [c.s.moodie@stir.ac.uk](mailto:c.s.moodie@stir.ac.uk)  
15  
16

17  
18 Authors: Crawford Moodie, Anne Marie Mackintosh  
19  
20

21  
22  
23 Author affiliations: Centre for Tobacco Control Research, Institute for Social Marketing,  
24  
25 University of Stirling, Stirling FK9 4LA, Scotland  
26  
27

28  
29 Running title: Young women smokers' response to plain packaging  
30  
31

32  
33  
34 Keywords: Tobacco, plain packaging, young adults  
35  
36

37  
38 Word count: 4,696  
39  
40  
41  
42  
43  
44  
45  
46  
47  
48  
49  
50  
51  
52  
53  
54  
55  
56  
57  
58  
59  
60

1  
2  
3 **Young adult women smokers' response to using plain cigarette packaging: A**  
4  
5 **naturalistic approach**  
6  
7  
8

9  
10 **Abstract**

11 **Objectives:** To explore young adult women smokers' cognitive and emotional response to  
12 using dark brown 'plain' cigarette packs in natural settings and whether plain packaging is  
13 associated with any short-term change in smoking behaviour.  
14  
15

16 **Design:** A naturalistic approach. Participants used plain cigarette packs provided to them for  
17 one week and their own fully branded packs for one week, but otherwise smoked and  
18 socialised as normal. Participants completed questionnaires twice a week.  
19  
20  
21  
22

23 **Setting:** The six largest-most populated cities and towns in Scotland.  
24  
25

26 **Participants:** 301 young women smokers were recruited, with a final sample of 188-187  
27 (62.15%). To meet the inclusion criteria women had to be between the ages of 18 and 35,  
28 daily cigarette smokers, and provide a breath sample to confirm smoking status.  
29  
30  
31

32 **Primary and secondary outcome measures:** Pack perceptions and feelings, feelings about  
33 smoking, salience and perceptions of health warnings, and avoidant and cessation behaviours.  
34  
35  
36

37 **Results:** In comparison to branded packaging, plain packaging was associated with more  
38 negative perceptions and feelings about the pack and about smoking ( $p<0.001$ ). No  
39 significant overall differences in salience, seriousness or believability of health warnings  
40 were found between the pack types, but participants reported looking more closely at the  
41 warnings on plain packs and also thinking more about what the warnings were telling them  
42 ( $p<0.001$ ). Participants reported being more likely to engage in avoidant behaviours, such as  
43 hiding or covering the pack ( $p<0.001$ ), and cessation behaviours, such as foregoing cigarettes  
44 ( $p<0.05$ ), smoking less around others ( $p<0.001$ ), thinking about quitting ( $p<0.001$ ) and  
45  
46  
47  
48  
49  
50  
51  
52  
53  
54  
55  
56  
57  
58  
59  
60



1  
2  
3 reduced consumption ( $p < 0.05$ ), when using the plain packs. Results did not differ by  
4  
5 dependence level or socio-economic status.  
6

7 **Conclusions:** No research design can capture the true impacts of plain packaging prior to its  
8  
9 introduction, but this study suggests that plain packaging may help to reduce cigarette  
10  
11 consumption and encourage cessation in the short-term.  
12  
13

14  
15  
16  
17  
18  
19  
20  
21  
22  
23  
24  
25  
26  
27  
28  
29  
30  
31  
32  
33  
34  
35  
36  
37  
38  
39  
40  
41  
42  
43  
44  
45  
46  
47  
48  
49  
50  
51  
52  
53  
54  
55  
56  
57  
58  
59  
60

For peer review only

## ARTICLE SUMMARY

### Article focus

- How young adult women smokers respond to using plain cigarette packaging, in comparison to fully branded [cigarette](#) packaging. We explored the impact of plain packaging on short-term smoking related behaviour

### Key messages

- Plain packaging was associated with lower ratings of enjoyment and satisfaction of smoking in comparison with fully branded packaging
- Participants reported looking more closely at the health warnings on plain packs and also thinking more about what the warnings were telling them
- Plain packaging, in comparison with fully branded packaging, was associated with forgoing cigarettes, smoking less around others, increased thoughts of cessation and reduced consumption

### Strengths and limitations

- The main strength of the study is that it allows an insight into how smokers respond to plain packaging before it has been introduced
- The main limitations are the novelty of ~~the~~ plain packaging and reliance on self-reported smoking behaviour

## Introduction

At the annual meeting of the Canadian Medical Association in 1986 it was proposed that all tobacco products should come in 'plain' brown standardised packs in order to minimise their attractiveness.<sup>1</sup> ~~Approximately a quarter of a century on and plain tobacco packaging will be introduced was fully implemented in Australia, for the first time, for all tobacco products in Australia from~~ December 2012. Prior to this, consultations on plain packaging ended in New Zealand in October and in the United Kingdom (UK) in August 2012. What the actual impacts of plain packaging will be, if any, remains to be seen however. A recent systematic review of the plain packaging literature, with 37 included studies, suggests that plain packaging may have a number of potential public health benefits, including: 1) reducing the appeal of the ~~packaging and of cigarettes, product and user,~~ 2) increasing the salience, believability and seriousness of the health warnings, although this was influenced by the type (pictorial or text), size and strength of the warnings used, and 3) increasing perceptions of harm, although this was dependent upon the colour of the plain pack, with darker coloured plain packs typically perceived as more harmful, and lighter coloured plain packs less harmful, than fully branded cigarette packs.<sup>2</sup>

One of the longstanding criticisms of the literature is that existing research typically involves gauging consumer response to plain packaging following brief exposure in a controlled environment and, as a result, fails to capture how consumers would react to and use plain packs over time in naturalistic settings. To date only one study has attempted a real world test of plain packaging, ~~This study using~~ a design which involved young adult men and women smokers in Glasgow (Scotland) transferring cigarettes from their own packs into plain packs provided and using these packs instead of their own packs for two weeks, and their own packs for two weeks ~~to allow for comparison.~~<sup>3</sup> Participants completed a questionnaire twice a

1  
2  
3 week throughout the study to allow for comparisons to be made between the plain packs and  
4 their own packs. Pack perceptions and feelings, and feelings about smoking, were more  
5  
6 negative for plain packs, and participants were more likely to report avoidant behaviours (e.g.  
7  
8 covering the pack) and cessation related behaviours (e.g. thinking about quitting) when using  
9  
10 the plain packs. Post-study interviews were conducted with a sub-sample of participants  
11  
12 (N=18) to explore their experiences of using the brown (plain) packs. In the post-study  
13  
14 interviews women were more likely than men to report avoidant behaviour when using the  
15  
16 plain packs, and only women reported reduced consumption when using plain packs. The  
17  
18 pilot nature of this study, recruitment within a single city, low retention rate (34%) and  
19  
20 relatively small final sample (N=48) means that further research is needed to test these  
21  
22 findings.  
23  
24  
25  
26  
27  
28

29  
30 We aimed to extend this previous study by following the same approach but with a larger and  
31  
32 more nationally distributed sample of young adult women smokers, who appeared to be more  
33  
34 influenced by pack design than men in the pilot study. While high rates of smoking among  
35  
36 women tend to be the norm in most of Europe, with a prevalence of 20% or more in all but  
37  
38 four of EU member countries (Italy, Portugal, Slovakia and Sweden), this contrasts sharply  
39  
40 with much of the rest of the world.<sup>4</sup> Prevalence of smoking among women is less than 20% in  
41  
42 the Middle East, North and Central America and Asia (excluding Lebanon and Nepal), and  
43  
44 less than 10% in Africa, where figures are available.<sup>4</sup> In the UK smoking prevalence among  
45  
46 women is currently 20% and in long-term decline, but prevalence is declining at a slower rate  
47  
48 than for men and even so prevalence remains particularly high for young adult women, with  
49  
50 25% of 25-34 year old women and 30% of 20-24 year old women smokers.<sup>5</sup>  
51  
52  
53  
54  
55  
56  
57  
58  
59  
60

1  
2  
3 The high smoking rates among young women in the UK represents a significant future  
4 burden of both mortality and morbidity should this trend not be reversed. With a growing  
5 number of slim, elegant cigarette packs targeted at young women being brought to market in  
6 the UK and elsewhere within the last five years, and given that the aesthetic appeal of  
7 cigarette packaging appears to be more important for young women than for young men,<sup>3,6,7,8</sup>  
8 plain packaging may have a role to play in reducing the high rates of smoking among young  
9 women. This study explored young women's experiences of using plain cigarette packaging  
10 as they went about their everyday lives.  
11  
12  
13  
14  
15  
16  
17  
18  
19  
20  
21  
22

## 23 **Methods**

### 24 *Design and sample*

25  
26  
27 Between June 2011 and March 2012 young adult ~~female-women~~ smokers (N=301) were  
28 recruited from eight postcode sectors from within the six most populated towns and cities in  
29 Scotland (Glasgow, Edinburgh, Aberdeen, Dundee, Paisley, East Kilbride) using random  
30 location quota sampling. The postcode sectors were randomly selected, stratified by  
31 DEPCAT score, which is a measure of multiple deprivation, to ensure coverage of a range of  
32 socio-economic backgrounds. Within each postcode sector, market recruiters were instructed  
33 to recruit either six or seven participants, using the door knock method, according to quota  
34 controls on age (18-24 / 25-35) and daily consumption (light, moderate smokers were defined  
35 as those smoking 14 cigarettes a day or less / heavy smokers as those smoking 15 cigarettes a  
36 day or more).  
37  
38  
39  
40  
41  
42  
43  
44  
45  
46  
47  
48  
49  
50

51 ~~All potential participants were informed by~~The market recruiters, who were briefed about the  
52 study protocol but blind to the purpose of the study, informed all potential participants that  
53 the study was concerned with smokers' opinions of cigarette packaging. If individuals were  
54  
55  
56  
57  
58  
59  
60

1  
2  
3 willing to participate and available for the duration of the study, they were asked to complete  
4  
5 a recruitment questionnaire, which included the Fagerström Test for Nicotine Dependence<sup>9</sup>  
6  
7 and questions regarding brand variant smoked, risk perceptions and cessation behaviour (e.g.  
8  
9 motivation to quit, attempts to quit). To ensure only smokers were recruited participants were  
10  
11 asked to provide a breath test sample using a piCO<sup>+</sup>™ Carbon Monoxide monitor (Bedfont  
12  
13 Scientific) and also an empty cigarette pack; in the four instances where a participant only  
14  
15 had a full pack, recruiters took a photo of their pack and texted this to a member of the  
16  
17 research team. Ethics approval was obtained from the ethics committee of the Marketing  
18  
19 Department at the University of Stirling. Participants provided informed consent before  
20  
21 taking part.  
22  
23  
24  
25  
26

### 27 *Materials and procedure*

28  
29 Participants were informed about the study protocol by market recruiters and, if they gave  
30  
31 consent, were provided with a 'completion' pack. ~~The~~ Each completion pack  
32  
33 ~~contains~~ included seven brown (plain) cigarette packs. These brown packs were only suitable  
34  
35 for participants who smoked King Size cigarettes, as was the case in a pilot study using the  
36  
37 same approach.<sup>3</sup> As nine of the top ten selling cigarette brand variants in the UK come in  
38  
39 King Size packs most smokers would have been eligible for study inclusion. However, as all  
40  
41 of the top 25 selling cigarette brand variants in the UK come in either King Size or  
42  
43 Superkings packs,<sup>10</sup> which are slightly bigger than the standard King Size pack, market  
44  
45 recruiters were given a box of Superkings plain packs and instructed to use these where  
46  
47 appropriate. This involved replacing the seven King Size brown packs within the completion  
48  
49 pack with seven Superkings brown packs if an individual smoked a Superkings brand or other  
50  
51 longer cigarettes, such as Slims or Superslims. The plain packs were otherwise identical,  
52  
53 with ~~with~~ had a fictitious brand name Kerrods, to prevent copyright breach, ~~but~~ and all  
54  
55  
56  
57  
58  
59  
60

1  
2  
3 relevant legal markings and a barcode. The completion packs also included five numbered  
4 questionnaires, labelled by day and date, and a timetable explaining when to use their own  
5 packs and the Kerrods packs and when to complete and return each of the five questionnaires.  
6  
7  
8  
9

10  
11 The study, which always started on a Monday, ran for two weeks. Participants were  
12 instructed ~~For either the first or second week, participants were instructed~~ to transfer  
13 cigarettes from their own packs into the Kerrods packs supplied to them and use these for one  
14 week of the study, and their own packs for the other week of the study. ~~Ordering~~ was  
15 randomised so that with half the sample ~~using~~ the plain pack in the first week of the study  
16 and half in the last-second week. Participants were instructed to retain and re-use the Kerrods  
17 packs if they smoked more than 20 cigarettes in a day. In the UK cigarette packs contain one  
18 of two text health warnings ~~used~~ on the front ('Smoking kills' or 'Smoking seriously harms  
19 you and others around you') and one of fourteen 'pictorial' warnings ~~used~~ on the reverse  
20 panel, although three are in fact text warnings as they do not display a picture, photo,  
21 pictogram or symbol. All ~~the~~ Kerrods packs had the same warning on the pack front  
22 (Smoking kills) and one of three 'pictorial' warnings on the reverse panel showing either; a  
23 set of healthy and diseased lungs, an image of smoke in a child's face, or a text warning about  
24 seeking help (see Figure 1). Past research has found these three warnings to have high  
25 (lungs), medium (smoke in child's face) and low salience (seeking help) among smokers.<sup>11</sup>  
26 Each completion pack contained at least two packs with each of the three warnings. We  
27 included packs with different health warnings and they were used to reflect the types of  
28 warnings ~~which that~~ smokers receive on packs and prevent all packs featuring only warnings  
29 found to have high or low salience, as this could potentially influence response to the warning  
30 items.  
31  
32  
33  
34  
35  
36  
37  
38  
39  
40  
41  
42  
43  
44  
45  
46  
47  
48  
49  
50  
51  
52  
53  
54  
55  
56  
57  
58  
59  
60

Figure 1 here

Participants were instructed to complete five questionnaires during the two weeks of the study. Questionnaires 1 and 2 were to be completed and returned, via pre-addressed envelopes or by email, on the Thursday and Sunday respectively of the first week. Questionnaires 3 and 4 were to be completed and returned on the Thursday and Sunday respectively in the second week. These first four questionnaires, which were identical (and were to be completed twice a week (each Thursday and Sunday) and returned them via pre-addressed envelopes or by email, see Appendix 1), for questionnaire used. This resulted in two questionnaires relating to their experience of the plain packs and two relating to their own pack. Questionnaire ~~number~~ 5 included the same questions as the pre-study questionnaire about risk perceptions and cessation behaviour, and was to be completed and returned on the same day as questionnaire 4 to reduce participant burden. This ~~but~~ is not included in this analysis.

Although the day and date each questionnaire was to be completed and returned was highlighted on the front cover and specified in the timetable, in an attempt to increase study compliance the research team sent a text message ~~was sent~~ to each participant the day before study onset, always a Sunday. The text reminded participants: 1) that the study would start the next day, 2) what packs they were to use for the coming week, and 3) to complete questionnaire 1 the following Thursday (the day and date was given for clarity). A second text message was sent the following Sunday to remind participants to complete and return questionnaire 2 that day, and on which packs to use for the following week. A third and final text was sent the subsequent Sunday, reminding participants to complete and return questionnaires 4 and 5 that day. Participants were also sent a reminder letter during the first



1  
2  
3 week of the study and an email was sent every Thursday and Sunday morning to participants  
4  
5 who had provided an email address as an additional reminder to complete and return the  
6  
7 questionnaires. To encourage the return of all the questionnaires participants were informed  
8  
9 that on top of the participation fee (£15.00) they would receive an incrementally greater  
10  
11 payment for each questionnaire returned; £2.50 if they returned one questionnaire, £7.00 if  
12  
13 they returned two questionnaires, £12.00 for three, £20.00 for four and £30.00 for all five.  
14  
15 Participants were provided with an information sheet to remind them of this incremental  
16  
17 payment plan.  
18  
19  
20  
21  
22

### 23 Analysis

24  
25 Prior to analysis, some items were recoded to ensure the same direction of coding and thus  
26  
27 facilitate creation and interpretation of composite variables. Composite scores were derived  
28  
29 for pack perceptions, pack feelings, feelings about smoking, and response to warnings, by  
30  
31 summing the individual items within each and then rescaling to a five-point scale. Cronbach's  
32  
33 alpha was acceptable for each, all above 0.70 with the exception of the overall health warning  
34  
35 response for own pack which had an alpha of 0.65, thus supporting the decision to create  
36  
37 composite scores for each measure and for each pack type.  
38  
39  
40  
41  
42

43 Ratings between fully branded and Kerrods plain packs were compared. Ratings collected on  
44  
45 the Thursday questionnaires are referred to as 'midweek' and those collected on the  
46  
47 following Sunday referred to as 'weekend'. For each analysis, midweek ratings of the  
48  
49 Kerrods pack were compared with midweek ratings of their own pack and weekend ratings of  
50  
51 the Kerrods pack were compared with weekend ratings of their own pack~~and to ensure that~~  
52  
53 ~~packs were compared against equivalent time points, ratings of the plain pack at the first and~~  
54  
55 ~~second measures were compared with ratings of their own pack at the first and second~~  
56  
57  
58  
59  
60

1  
2  
3 | ~~measures, respectively. For each time point, p~~Paired t-tests were used to produce mean scores  
4  
5 | for the ~~plain Kerrods~~ packs relative to mean scores for their own pack. Given the ordinal  
6  
7 | nature of the five-point scales, the Wilcoxon Signed Rank test was used to test for differences  
8  
9 |  
10 | between ratings of ~~the plain Kerrods~~ packs versus participant's own packs ~~at each measure~~.  
11  
12 | As the data on avoidant/cessation behaviours were binary (yes/no) the McNemar test was  
13  
14 | used to test for differences in response ~~between participants' first and second measure on the~~  
15 | ~~plain pack and the respective measure on their own pack~~ to the Kerrods pack versus their own  
16 | ~~pack~~. The number of avoidant/cessation behaviours associated with each pack was also  
17  
18 | counted and paired t-tests ~~were~~ used to test for differences in the mean number of actions  
19  
20 | taken with the Kerrods pack versus their own pack. ~~Similarly, paired t-tests were used to test~~  
21 | ~~for differences in mean reported daily consumption when using the Kerrods pack versus their~~  
22 | ~~own pack. Comparisons across time were also made by comparing the midweek composite~~  
23 | ~~scores for the Kerrods pack versus the weekend composite scores for the Kerrods pack and~~  
24 | ~~comparing the midweek composite scores for their own pack versus the weekend composite~~  
25 | ~~scores for their own pack. The Wilcoxon Signed Rank test was used to test for differences,~~  
26 | ~~across time, in the composite scores. Paired t-tests were used to test for differences between~~  
27 | ~~midweek and weekend reports on the number of avoidant/cessation behaviours and reported~~  
28 | ~~daily consumption with each pack at each measure. Composite scores for each pack type~~  
29 | ~~were also compared across the two time points, using Wilcoxon Signed Rank test, to examine~~  
30 | ~~whether composite ratings for each pack type was consistent across time. Paired t tests were~~  
31 | ~~used to compare, at each time point, reported daily consumption when using the Kerrods~~  
32 | ~~pack versus their own pack.~~  
33  
34  
35  
36  
37  
38  
39  
40  
41  
42  
43  
44  
45  
46  
47  
48  
49  
50  
51

52  
53  
54 | Given the paucity of plain packaging research exploring sub-group differences,<sup>2</sup> analyses of  
55  
56 | the composite scores were also run separately to explore whether the results were consistent  
57  
58  
59  
60

1  
2  
3 by age group (18-24, 25-35), social grade (ABC1, C2DE) and dependence level  
4  
5 (~~lightow/moderateedium~~, high). Social grade was measured via occupation of the participant,  
6  
7 using a social grading scale HOW WAS IT CALCULATED?. Social grade, based on  
8  
9 occupation, was classified in accordance with the six groups (A – upper middle class; B –  
10  
11 middle class; C1 – lower middle class; C2 – skilled working class; D – working class and E –  
12  
13 those at lowest level of subsistence) used by the British National Readership Survey. These  
14  
15 six groups were combined to form two groups to enable broad comparison between middle  
16  
17 class (ABC1) and working class (C2DE) participants. Dependence level was measured via  
18  
19 the Fagerström Test for Nicotine Dependence,<sup>9</sup> with those scoring between 0-5 categorised as  
20  
21 having ~~lightow/moderateedium~~-dependence and those scoring 6-10 high dependence levels.  
22  
23  
24  
25  
26

## 27 RESULTS

28  
29 Of the 301 participants recruited, 54 (17.9%) were non-completers, who failed to participate  
30  
31 at all after completing the pre-study questionnaire, ~~59-60~~ (19.69%) were partial completers,  
32  
33 who failed to return all the questionnaires or reported using the incorrect pack (e.g. they used  
34  
35 their own packs when they were meant to be using the Kerrods packs), and ~~188-187~~ (62.51%)  
36  
37 were full completers, who returned all the questionnaires and reported using the correct  
38  
39 packs. Results presented in this paper are based on the full completers. The average age of the  
40  
41 full completers was 27.14 years (sd 5.63); 84 (44.9%) were from social grade ABC1 and 103  
42  
43 (55.1%) from social grade C2DE; 96 (51.3%) had light/moderate dependence and 91  
44  
45 (48.47%) high dependence; ~~and~~ average daily cigarette consumption was 17.28 (sd 7.19); 33  
46  
47 (17.6%) had given up for one day or more in the previous month and 129 (69.0%) indicated  
48  
49 that they would like to or really wanted to give up smoking. There was no significant  
50  
51 difference in terms of age, dependence level or motivation to quit between those included in  
52  
53 the analyses and those excluded (non-completers and partial completers). However,  
54  
55  
56  
57  
58  
59  
60

1  
2  
3 [participants from social group ABC1](#) were more likely to complete the study fully (71.2% of  
4  
5 [ABC1s were full completers v 56.6% of C2DEs, p<0.05](#)) as were participants with a past  
6  
7 [month quit attempt of one day or more \(78.6% of those with a past month quit attempt](#)  
8  
9 [completed the study fully v 59.7% of those with no past month quit attempt, p<0.05\).](#)  
10  
11

### 12 13 14 **Pack Perceptions**

15  
16 On average, participants rated Kerrods negatively on all pack perceptions (not stylish,  
17  
18 unfashionable, cheap, uncool, unattractive, poor quality, unappealing), with mean scores  
19  
20 ranging from 1.55 to 2.37; lower scores indicating more negative perceptions (see Table 1a).  
21  
22 For their own packs the higher mean scores, ranging from 2.91 to 3.69, indicated more  
23  
24 positive pack perceptions. For the overall pack perception score (all items combined),  
25  
26 participants rated the Kerrods pack more negatively than their own pack, and this did not vary  
27  
28 across time for either pack. Results were consistent by age group, social grade and  
29  
30 dependence level.  
31  
32

33  
34  
35  
36 Table 1 here  
37  
38  
39

### 40 41 **Pack Feelings**

42  
43 On average, participants reported more negative feelings (embarrassed, ashamed, unaccepted)  
44  
45 about using the Kerrods pack, relative to their own pack (see Table 1b). For the Kerrods  
46  
47 pack, mean scores ranged from 2.54 to 3.10, whereas mean scores for their own pack ranged  
48  
49 from 3.26 to 4.08. For both their own packs and the Kerrods packs, [overall](#) pack feelings  
50  
51 were [rated](#) more negatively [ly](#) at the [weekend compared with midweek \(p<0.001\)](#)[second](#)  
52  
53 [measure](#). Results were consistent by age group, social grade and dependence level.  
54  
55  
56  
57  
58  
59  
60

## Feelings about smoking

Participants reported more negative feelings about smoking from the Kerrods pack, in terms of enjoyment, satisfaction and feeling good, from the Kerrods pack relative to their own pack (see Table 1c). For the Kerrods pack, mean scores ranged from 2.68 to 2.99 3.13 to 3.52, while mean scores for their own packs ranged from 2.68 to 2.99 3.13 to 3.52. participants, on average, rated the smoking experience with their own pack as more 'enjoyable' (mean scores 3.40) and 'satisfying' (mean scores 3.41 to 3.52), for Kerrods the average ratings suggested they were less enjoyable (mean scores 2.73 to 2.90) and satisfying (mean scores 2.83 to 2.99). Participants were more likely to feel 'good' about smoking when using their own packs (mean scores 3.13 to 3.19) than when using the Kerrods pack (mean scores 2.68 to 2.73). Overall ratings for their own packs did not vary across time. For the Kerrods pack, overall feelings about smoking were rated more negatively at the weekend compared with midweek second measure ( $p < 0.05$ ). Results were consistent across age group, social grade and dependence level.

## Health warnings

### *Salience, seriousness and believability*

For both pack types, the on-pack health warnings were rated as being noticeable (mean scores 3.41 to 3.44), serious (3.83 to 3.94) and believable (3.91 to 4.10), see Table 2. At the weekend second measure only, warnings on the Kerrods packs were rated as more believable relative to participants' own packs. However, overall ratings of the warnings did not differ between the packs, and did not vary across time for either pack. Findings were consistent across age, social grade and dependence level.

Table 2 here

### *Attention and depth of processing*

Warnings were rated as being read more closely on the Kerrods pack (mean scores 2.97 to 3.00) than on their own packs (mean scores 2.28 to 2.58), and thought about more on the Kerrods pack (mean scores 3.02 to 3.16) relative to participants' own packs (mean scores 2.52 to 2.80). The overall results were consistent for the age and dependence level subgroups. However, at the ~~weekendsecond measure~~, participants from social grade C2DE did not show any significant difference, between Kerrods and own pack, in overall warning action response. While there was no difference in the overall Kerrods ratingsmeasures across time, the own pack ratings were stronger at the ~~weekend second own pack measure~~ compared with ~~the midweek first measure~~ ( $p < 0.001$ ).

### **Avoidant behaviour/Behaviour change**

~~Across the two measures, p~~Participants always indicated greater occurrence of the following actions when using the Kerrods packs: keeping the pack out of sight; covering the pack; foregoing cigarettes; smoking less around others; thinking about quitting (Table 3). In addition, when using the Kerrods pack, participants were ~~always~~ more likely to stub out a cigarette, although only significantly so at the ~~weekendsecond measure~~. They were also more likely to want to quit smoking, when using the Kerrods pack, though only significantly so at midweek. On average, participants reported a higher number of behaviour changes or avoidant behaviours when using the Kerrods pack (1.88 and 2.29 ~~at the first and second measuresmidweek and weekend~~ respectively) compared with their own pack (0.84 and 1.12 ~~at the first and second measuresmidweek and weekend~~ respectively). This result was consistent by age, social grade and dependence level. For each pack type, the number of

behaviour changes/avoidant behaviours increased at the [weekend second measure](#) (p<0.001 for Kerrods and p<0.01 for own pack).

[Table 3 here](#)

~~At each measure,~~ Reported consumption was [always](#) lower with the Kerrods pack compared with participants' own pack. ~~For the first measure,~~ [Midweek](#) average daily consumption was 14.9 when using Kerrods and 15.5 when [using](#) their own pack (p<0.05), with [weekend average](#) daily consumption ~~at the second measure~~ 15.7 when using Kerrods and 16.7 when using their own pack (p<0.01). [The pattern of lower consumption, when using the Kerrods pack versus their own pack, was observed within each of the age, social grade and dependence level sub-groups, but did not always reach significance.](#) Consumption was higher at the [weekend second measure](#) for each pack (p<0.05 for Kerrods and p<0.01 for own pack).

[Table 3 here](#)

## Discussion

For young adult [female-women](#) smokers, a key target group for public health, the use of dark brown (plain) cigarette packs in naturalistic settings was associated with more negative perceptions and feelings about the packaging and about smoking than for their own fully branded packs. As with past research in the UK the base colour of the plain packs, a faecal brown, was perceived negatively.<sup>3.7.12.13</sup> Plain packs were also associated with more negative feelings about the pack, in terms of embarrassment and shame, lower ratings of enjoyment and satisfaction of smoking, and increased avoidant (hiding and covering the pack) and cessation related smoking behaviours (stubbing out cigarettes early, forgoing cigarettes and

1  
2  
3 reduced consumption). These findings closely reflect those of a pilot study using the same  
4 approach.<sup>3</sup> The key differences to emerge between the studies were that in the pilot study  
5 stubbing out cigarettes early when using the plain packs was never significant and forgoing  
6 cigarettes when using plain packs was not always significant. As level of consumption was  
7 not measured in the pilot study questionnaires no comparisons can be made.  
8  
9  
10  
11  
12  
13

### 14 15 16 **Study strengths**

17  
18 The study permits an insight into how smokers respond to plain packaging in natural settings  
19 before it has been introduced. It is difficult to envisage an alternative approach which would  
20 allow smoking related behaviours to be captured, such as stubbing out cigarettes early,  
21 forgoing cigarettes and reduced consumption. Similarly, as the study did not involve forced  
22 exposure to packaging it more accurately reflects how smokers respond to the on-pack health  
23 warnings, in respect to the attention they are given, how they are perceived and also how  
24 deeply they are processed. There were no significant overall differences in ratings of warning  
25 salience, seriousness and believability, consistent with a pilot naturalistic study and two  
26 recent eye-tracking studies from the UK.<sup>3,14,15</sup> Warning design may, in part, help explain  
27 these findings. The positioning of images only on the reverse panel of packaging is  
28 inconsistent with the Guidelines for Article 11 of the Framework Convention on Tobacco  
29 Control<sup>16</sup> and best international practice. Indeed,; ~~only two~~ very few countries outside of  
30 Europe that require pictorial warnings to be displayed on cigarette packs, such as Argentina  
31 and Brazil and Venezuela, fail to use pictorial warnings on the pack front). Including pictorial  
32 warnings only on the reverse panel of packaging ~~and~~ has been found to reduce warning  
33 effectiveness.<sup>9,16</sup> Similarly, lack of rotation is likely to have increased wear-out; although  
34 images appeared on the reverse panel of packs in the UK in 2008 to support the warning text,  
35 these text has been on packs since 2003. Warnings on plain packs were read more closely and  
36  
37  
38  
39  
40  
41  
42  
43  
44  
45  
46  
47  
48  
49  
50  
51  
52  
53  
54  
55  
56  
57  
58  
59  
60



1  
2  
3 thought about more than on fully branded packs however. That warnings on plain packs were  
4  
5 attended to more closely and more deeply processed, which was not assessed in the pilot  
6  
7 study, has not, we believe, been previously reported in the plain packaging literature, and as  
8  
9 such advances our understanding of the possible real-world impacts of plain packaging.  
10  
11

12  
13  
14 It is not only cessation related behaviours such as stubbing out or forgoing cigarettes which  
15  
16 can be captured with such an approach, but also behaviours such as smoking less around  
17  
18 other people. The UK Department of Health speculate that a potential benefit of plain  
19  
20 packaging could be to reduce exposure to second-hand smoke (SHS) from reduced rates of  
21  
22 smoking,<sup>17</sup> which would reduce the high annual direct costs to the NHS incurred by treating  
23  
24 illness related to exposure to SHS.<sup>18</sup> That young women reported smoking less around others  
25  
26 when using the plain packs suggests that the appearance of the pack, and how it makes some  
27  
28 young women feel and think about smoking, may in itself lead to lower exposure to SHS. The  
29  
30 Department of Health also suggested that future research consider consumer response to plain  
31  
32 packaging across socioeconomic groups,<sup>17</sup> which is somewhat surprisingly lacking in the  
33  
34 existing literature.<sup>2</sup> We found no significant differences across income group, or indeed by  
35  
36 age or dependence level. While this suggests that plain packaging ecould potentially help  
37  
38 benefit all young women, caution should be exercised as the sample size did not permit a  
39  
40 more detailed breakdown of socio-economic status or dependence.  
41  
42  
43  
44  
45  
46

### 47 **Limitations**

48  
49 The study has a number of limitations. The reliance on self-reporting, both in terms of  
50  
51 reported behaviour change and the use of the Kerrods packs, is a potential limitation. G  
52  
53 although given the high level of participant involvement and the nature of the research it is  
54  
55 difficult to see a viable alternative. One way would have been to provide participants with  
56  
57  
58  
59  
60

1  
2  
3 their brand of cigarettes already within the plain packs, which would eliminate the need for  
4  
5 cigarettes to be transferred from one pack into another, but ethical concerns prohibited us  
6  
7 from doing so. While the generic brand name (Kerrods), used to avoid breach of copyright,  
8  
9 was intended to be neutral and has previously been found to have no positive or negative  
10  
11 associations among smokers,<sup>7</sup> it is nevertheless possible that this may have had an impact on  
12  
13 participant's perceptions of plain packaging. The findings cannot be generalised to all young  
14  
15 women smokers and provides no insight into the impact of plain packaging on older women  
16  
17 smokers, male smokers or non-smokers, although the exclusive focus on young women was  
18  
19 taken given high smoking prevalence among this group. It is also possible that participants  
20  
21 may respond differently if only plain packs were available on the legitimate market. Clearly,  
22  
23 the true impacts of standardising the appearance of all legitimate cigarette packs on the  
24  
25 market remain unclear. Research in Australia can help shed further light on the impacts of  
26  
27 plain packaging. ~~However, but given that Australia has stronger tobacco control, and~~  
28  
29 ~~lower prevalence of nicotine use than the largest on-pack warnings in the world and low~~  
30  
31 ~~prevalence of nicotine use, anywhere in the European Union (EU), and as the appearance of~~  
32  
33 ~~plain packaging in Australia would almost certainly differ from that of plain packs in the EU,~~  
34  
35 ~~at least in terms of the size, type and positioning of the on-pack health warnings, the further~~  
36  
37 research in Europe and elsewhere using approaches that more closely approximate what  
38  
39 consumers experience when using plain packs in naturalistic settings is required.  
40  
41  
42  
43  
44  
45  
46

### 47 **Implications for policy makers and clinicians**

48  
49 As a number of governments ~~and executive bodies~~ consider the merits of plain packaging as a  
50  
51 policy measure these findings may help inform the decision making process. It is ultimately  
52  
53 for policy makers to assess the potential value of plain packaging as part of a comprehensive  
54  
55 suite of tobacco control measures aimed at reducing consumption and prevalence, but the  
56  
57  
58  
59  
60

1  
2  
3 collective evidence generally provides support for plain packaging, irrespective of design,  
4  
5 location and sample.<sup>2</sup> This study extends this growing body of evidence and is the first to find  
6  
7 that smokers were more likely to stub out cigarettes early and reduce consumption when  
8  
9 using plain packs. These findings are relevant to the National Institute for Health and Clinical  
10  
11 Excellence (NICE) draft guidelines on harm-reduction approaches to smoking, published in  
12  
13 October 2012,<sup>19</sup> which positions quitting as the target but points to potential health benefits of  
14  
15 consuming fewer cigarettes, or less of each cigarette. Further research ~~that is required to~~  
16  
17 ~~provide~~ greater insight into the impacts of plain packaging on smoking behaviour, and  
18  
19 more broadly what the health benefits, if any, of reduced consumption and intake are,<sup>19</sup>  
20  
21 ~~would be of value. However, but the present~~ findings contribute to the harm-reduction  
22  
23 debate and suggest that plain packaging may have a role to play in this proposed harm-  
24  
25 reduction approach.  
26  
27  
28  
29  
30  
31

32 The study also points to opportunities for clinicians. While plain packaging was found to  
33  
34 increase thoughts of quitting, even when using their own packs between a quarter and a third  
35  
36 of young women reported thinking about and wanting to quit. Smoking rates are higher  
37  
38 among young women than for older women and for males of any age,<sup>5</sup> and prevalence among  
39  
40 20-24 year olds has declined at a slower rate than for any other age group in the last quarter  
41  
42 of a century, from 35% in 1984 to 30% in 2010.<sup>5</sup> As such, the desire to change among a  
43  
44 significant percentage of such a key target group suggests that ~~this group~~ young women may  
45  
46 benefit from intervention by clinicians or health care professionals.  
47  
48  
49  
50  
51

## 52 Notes

53  
54 Acknowledgements: Diane Dixon for her help with co-ordinating the study and data input,  
55  
56 and Bedfont Scientific for providing piCO<sup>+</sup>™ Carbon Monoxide monitors.  
57  
58  
59  
60

Contributors: CM designed data collection tools, monitored data collection, cleaned the data, and drafted and revised the paper. CM is guarantor. AMM designed data collection tools, analysed the data, and drafted and revised the paper.

Funding: This ~~work~~ work was supported by Cancer Research UK grant number A13467. The funders had no role in study design; in the collection, analysis, and interpretation of data; in the writing of the report; and in the decision to submit the article for publication. The researchers are independent from the funders.

Competing interests: None.

Ethical approval: The study obtained ethics approval from the ethics committee of the Marketing Department at the University of Stirling. Participants provided informed consent before taking part.

Data sharing: No additional data available.

## References

1. Lee B. Sell tobacco in no-frills wrappers, urge doctors. *The Journal* 1986;10;5.
2. Moodie C, Stead M, Bauld L, et al. *Plain tobacco packaging: A systematic review*. Stirling: Centre for Tobacco Control Research, University of Stirling, 2012.
3. Moodie C, Hastings GB, Mackintosh AM, et al. Young adult smokers' perceptions of plain packaging: A pilot naturalistic study. *Tob Control* 2011;20:367-73.
4. Eriksen M, Mackay J, Ross H. *The tobacco atlas (4<sup>th</sup> Edition)*. Atlanta, Georgia: American Cancer Society, 2012.
5. The NHS Information Centre. *Statistics on Smoking: England, 2012*. London: The Health and Social Care Information Centre, 2012.
6. Doxey J, Hammond D. Deadly in pink: The impact of female-oriented cigarette packaging among young women. *Tob Control* 2011;20:353-60.

1  
2  
3 7. Moodie C, Ford A. Young adult smokers' perceptions of cigarette pack innovation, pack  
4 colour and plain packaging. *Australasian Market J* 2011;19:174–80.  
5  
6  
7

8  
9  
10 8. Carpenter CM, Wayne GF, Connolly GN. Designing cigarettes for women: New findings  
11 from the tobacco industry documents. *Addiction* 2005;100:837-51.  
12  
13

14  
15  
16 9. Heatherton TF, Kozlowski LT, Frecker RC, et al. The Fagerstrom Test for Nicotine  
17 Dependence: A revision of the Fagerstrom Tolerance Questionnaire. *Br J Addictions*  
18 1991;86:1119-27.  
19  
20  
21

22  
23  
24  
25 10. Hegarty R. Do dark times lie ahead? *The Grocer*, 18 February 2012.  
26  
27

28  
29  
30 11. Wardle H, Pickup D, Lee L, et al. *Evaluating the impact of picture health warnings on*  
31 *cigarette packets*. London: Public Health Research Consortium, 2012.  
32  
33

34  
35  
36 12. Moodie C, Ford A, Mackintosh AM, et al. Young people's perceptions of cigarette  
37 packaging and plain packaging: An online survey. *Nic Tob Res* 2012;14:98-105.  
38  
39

40 ~~13. Ford A, Moodie C, Mackintosh AM, et al. *Youth and tobacco packaging: Awareness,*~~  
41 ~~*appreciation and receptivity*. Poster presentation at 15<sup>th</sup> World Conference on Tobacco or~~  
42 ~~*Health, Singapore, March 2012.*~~  
43  
44  
45  
46  
47

48  
49 13. Centre for Tobacco Control Research. *The packaging of tobacco products*. Stirling:  
50 Centre for Tobacco Control Research, University of Stirling; 2012.  
51  
52

53  
54  
55  
56 14. Munafo M, Roberts N, Bauld L, et al. Plain packaging increases visual attention to  
57  
58  
59  
60

1  
2  
3 health warnings on cigarette packs in non-smokers and weekly smokers but not daily  
4  
5 smokers. *Addiction* 2011;106:1505-10.  
6  
7

8  
9  
10 15. Maynard O, Munafó M, Leonards U. Visual attention to health warnings on plain tobacco  
11 packaging in adolescent smokers and non-smokers. *Addiction* [2013;108:413-9.\(forthcoming\)](#).  
12  
13

14  
15  
16 16. World Health Organisation. *Elaboration of guidelines for implementation of Article 11 of*  
17 *the Convention. Third session of the Conference of the Parties to the WHO Framework*  
18 *Convention on Tobacco Control*. Durban, South Africa, 17–22 November 2008.  
19  
20  
21 [http://www.who.int/fctc/guidelines/article\\_11.pdf](http://www.who.int/fctc/guidelines/article_11.pdf) (accessed 8 September 2012)  
22  
23

24  
25 ~~16. Moodie C, Mackintosh AM, Hastings. *The impact of combined text/pictorial health*~~  
26 ~~*warnings on cigarette packs compared to text only warnings: Findings from the Youth*~~  
27 ~~*Tobacco Policy Survey (YTPS). Presentation given at Tackling Smoking in the 21<sup>st</sup> Century,*~~  
28 ~~*York, November 2012.*~~  
29  
30  
31  
32  
33

34  
35  
36 17. Department of Health. *Consultation on standardised packaging of tobacco products:*  
37 *Equality Impact Assessment*. London: Department of Health, 2012.  
38  
39  
40

41  
42  
43 18. Royal College of Physicians. *Passive smoking and children*. London: Royal College of  
44 Physicians, 2010.  
45  
46  
47

48  
49  
50 19. National Institute for Health and Clinical Excellence. *Tobacco: harm-reduction*  
51 *approaches to smoking*. London: NICE, 2012.  
52  
53 <http://www.nice.org.uk/nicemedia/live/13018/61198/61198.pdf>  
54  
55  
56  
57  
58  
59  
60

**Table 1.** Mean ratings on response to Kerrods pack v Own pack for pack perceptions, pack feelings and feelings about smoking

|                                      | <u>1st Measure</u> <u>Midweek</u> |                     | <u>2nd</u>     |                     |
|--------------------------------------|-----------------------------------|---------------------|----------------|---------------------|
|                                      | <u>Kerrods</u>                    | <u>Own</u>          | <u>Kerrods</u> | <u>Own</u>          |
|                                      | mean                              | mean                | mean           | mean                |
|                                      | <i>sd</i>                         | <i>sd</i>           | <i>sd</i>      | <i>sd</i>           |
| <b>a) Pack Perceptions (7 items)</b> |                                   |                     |                |                     |
| Style                                | 1.55                              | 3.16 <sup>***</sup> | 1.62           | 3.23 <sup>***</sup> |
| not stylish(1)/stylish(5)            | 0.88                              | 0.99                | 0.90           | 0.98                |
| Fashion                              | 2.30                              | 3.07 <sup>***</sup> | 1.88           | 3.08 <sup>***</sup> |
| unfashionable(1)/fashionable(5)      | 1.53                              | 1.03                | 1.22           | 1.02                |
| Cheap                                | 1.74                              | 3.30 <sup>***</sup> | 1.90           | 3.37 <sup>***</sup> |
| cheap(1)/expensive(5)                | 0.99                              | 1.08                | 1.02           | 1.03                |
| Cool                                 | 1.74                              | 2.95 <sup>***</sup> | 1.76           | 2.91 <sup>***</sup> |
| uncool(1)/cool(5)                    | 0.87                              | 0.99                | 0.89           | 0.94                |
| Attractive                           | 1.78                              | 3.03 <sup>***</sup> | 1.72           | 3.07 <sup>***</sup> |
| unattractive(1)/attractive(5)        | 1.15                              | 1.14                | 0.99           | 1.05                |
| Quality                              | 2.37                              | 3.69 <sup>***</sup> | 2.26           | 3.64 <sup>***</sup> |
| poor quality(1)/good quality(5)      | 1.16                              | 0.95                | 1.11           | 0.93                |
| Appealing                            | 1.81                              | 3.19 <sup>***</sup> | 1.85           | 3.16 <sup>***</sup> |
| unappealing(1)/appealing(5)          | 1.06                              | 1.08                | 1.04           | 0.97                |

### Overall Pack Perceptions



|                                                                      |             |                     |             |                     |
|----------------------------------------------------------------------|-------------|---------------------|-------------|---------------------|
| Composite score                                                      | 1.90        | 3.19 <sup>***</sup> | 1.85        | 3.21 <sup>***</sup> |
| Low score = negative perceptions / High score = positive perceptions | <u>0.72</u> | <u>0.07</u>         | <u>0.73</u> | <u>0.76</u>         |

---

**b) Pack Feelings (3 items)**

|                                   |      |                     |      |                     |
|-----------------------------------|------|---------------------|------|---------------------|
| Embarrassment                     | 2.70 | 4.08 <sup>***</sup> | 2.54 | 3.84 <sup>***</sup> |
| embarrassed(1)/not embarrassed(5) | 1.29 | 1.14                | 1.25 | 1.04                |
| Ashamed                           | 3.10 | 4.02 <sup>***</sup> | 2.71 | 3.72 <sup>***</sup> |
| ashamed(1)/not ashamed(5)         | 1.26 | 1.12                | 1.18 | 1.08                |
| Acceptance                        | 2.69 | 3.37 <sup>***</sup> | 2.55 | 3.26 <sup>***</sup> |
| unaccepted(1)/accepted(5)         | 1.02 | 1.07                | 0.95 | 0.99                |

**Overall Pack Feelings**

|                                                                      |             |                     |             |                     |
|----------------------------------------------------------------------|-------------|---------------------|-------------|---------------------|
| Composite score                                                      | 2.84        | 3.82 <sup>***</sup> | 2.60        | 3.62 <sup>***</sup> |
| Low score = negative perceptions / High score = positive perceptions | <u>1.03</u> | <u>0.92</u>         | <u>0.99</u> | <u>0.86</u>         |

---

**c) Feelings about smoking**
**(3 items)**

|                            |      |                     |      |                     |
|----------------------------|------|---------------------|------|---------------------|
| Enjoyment                  | 2.90 | 3.40 <sup>***</sup> | 2.73 | 3.40 <sup>***</sup> |
| enjoyable(1)/ enjoyable(5) | 0.97 | 0.95                | 0.97 | 0.96                |
| Satisfaction               | 2.99 | 3.52 <sup>***</sup> | 2.83 | 3.41 <sup>***</sup> |

|                                 |      |         |      |         |
|---------------------------------|------|---------|------|---------|
| not satisfying(1)/satisfying(5) | 0.99 | 0.93    | 1.00 | 0.98    |
| Good                            | 2.73 | 3.13*** | 2.68 | 3.19*** |
| bad(1)/good(5)                  | 0.87 | 0.93    | 0.95 | 0.98    |

### Overall Feelings Smoking

|                                                                      |             |             |             |             |
|----------------------------------------------------------------------|-------------|-------------|-------------|-------------|
| Composite score                                                      | 2.88        | 3.36***     | 2.75        | 3.34***     |
| Low score = negative perceptions / High score = positive perceptions | <u>0.82</u> | <u>0.83</u> | <u>0.89</u> | <u>0.87</u> |

\*\*\* p<0.001; \*\* p<0.01; \* p<0.05

**Table 2.** Mean ratings on response to Kerrods pack v Own pack for health warning salience and credibility, and attention and depth of processing

|                                                                | <u>1st Measure</u> |                    | <u>2nd Measure</u> |                    |
|----------------------------------------------------------------|--------------------|--------------------|--------------------|--------------------|
|                                                                | <u>Midweek</u>     | <u>Weekend</u>     | <u>Midweek</u>     | <u>Weekend</u>     |
|                                                                | <b>Kerrods</b>     | <b>Own</b>         | <b>Kerrods</b>     | <b>Own</b>         |
| <b>Health warnings</b>                                         | mean               | mean               | mean               | mean               |
| <b>(salience and credibility)</b>                              | <i>sd</i>          | <i>sd</i>          | <i>sd</i>          | <i>sd</i>          |
| Noticing                                                       | 3.44               | 3.43               | 3.41               | 3.25               |
| hardly noticeable(1)/very(5)                                   | <i>1.39</i>        | <i>1.33</i>        | <i>1.40</i>        | <i>1.29</i>        |
| Seriousness                                                    | 3.94               | 3.83               | 3.84               | 3.89               |
| not serious(1)/ serious(5)                                     | <i>1.12</i>        | <i>1.12</i>        | <i>1.26</i>        | <i>1.04</i>        |
| Believability                                                  | 4.10               | 4.08               | 4.09               | 3.91*              |
| Not believable(1)/<br>believable(5)                            | <i>1.09</i>        | <i>0.98</i>        | <i>1.09</i>        | <i>1.06</i>        |
| <b>Overall Warning Response</b>                                |                    |                    |                    |                    |
| Composite score                                                | 3.92               | 3.77               | 3.77               | 3.67               |
| Low score = little, no impact /<br>High score = high impact    | <u><i>0.97</i></u> | <u><i>0.93</i></u> | <u><i>1.01</i></u> | <u><i>0.88</i></u> |
| <b>Health warnings (attention<br/>and depth of processing)</b> |                    |                    |                    |                    |
| Attention                                                      | 3.00               | 2.28***            | 2.97               | 2.58***            |
| not looking                                                    | <i>1.47</i>        | <i>1.34</i>        | <i>1.51</i>        | <i>1.35</i>        |

|    |                               |      |                     |      |                     |
|----|-------------------------------|------|---------------------|------|---------------------|
| 1  |                               |      |                     |      |                     |
| 2  |                               |      |                     |      |                     |
| 3  | closely(1)/looking closely(5) |      |                     |      |                     |
| 4  |                               |      |                     |      |                     |
| 5  | Thinking about warnings       | 3.02 | 2.52 <sup>***</sup> | 3.16 | 2.80 <sup>***</sup> |
| 6  |                               |      |                     |      |                     |
| 7  | not think about what they are |      |                     |      |                     |
| 8  |                               |      |                     |      |                     |
| 9  | telling you(1)/thinking about |      |                     |      |                     |
| 10 |                               |      |                     |      |                     |
| 11 | what they are telling you(5)  | 1.41 | 1.36                | 1.47 | 1.34                |
| 12 |                               |      |                     |      |                     |
| 13 |                               |      |                     |      |                     |

### Overall Warning Action

#### Response

|    |                            |             |                     |             |                     |
|----|----------------------------|-------------|---------------------|-------------|---------------------|
| 20 | Composite score            | 3.00        | 2.39 <sup>***</sup> | 3.06        | 2.69 <sup>***</sup> |
| 21 |                            |             |                     |             |                     |
| 22 | Low score = little or no   |             |                     |             |                     |
| 23 |                            |             |                     |             |                     |
| 24 | action / high score = high |             |                     |             |                     |
| 25 |                            |             |                     |             |                     |
| 26 |                            |             |                     |             |                     |
| 27 | action                     | <u>1.38</u> | <u>1.26</u>         | <u>1.42</u> | <u>1.27</u>         |
| 28 |                            |             |                     |             |                     |
| 29 |                            |             |                     |             |                     |

\*\*\* p<0.001; \*\* p<0.01; \* p<0.05

**Table 3:** Proportion of participants reporting avoidant behaviour or behaviour change as a result of the pack

| Behaviour change /<br>avoidant behaviour | <u>1st Measure</u> <u>Midweek</u> |          | <u>2nd Measure</u> <u>Weekend</u> |          |
|------------------------------------------|-----------------------------------|----------|-----------------------------------|----------|
|                                          | Kerros<br>%                       | Own<br>% | Kerros<br>%                       | Own<br>% |
| Stub out cigarette                       | 10                                | 5        | 17                                | 10*      |
| Forego a cigarette                       | 13                                | 4**      | 15                                | 10*      |
| Keep pack out of sight                   | 53                                | 11***    | 55                                | 10***    |
| Cover pack                               | 10                                | 2***     | 10                                | 23***    |
| Smoke less around<br>others              | 21                                | 31***    | 39                                | 16***    |
| Think about quitting                     | 39                                | 26***    | 46                                | 34***    |
| Want to quit                             | 33                                | 25*      | 37                                | 32       |
| <i>Mean number of<br/>actions</i>        | 1.88                              | 0.84***  | 2.29                              | 1.12***  |
| <i>sd</i>                                | 1.80                              | 1.36     | 2.16                              | 1.61     |

\*\*\* p<0.001; \*\* p<0.01; \* p<0.05

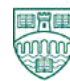

## PACKAGING SURVEY 2011

### Questionnaire 1

**COMPLETE AND RETURN ON THURSDAY 18<sup>TH</sup> AUGUST**

#### What it's about

We want to find out how you feel about using particular cigarette packs. Please answer the questions on the day and date highlighted above and return it, **on this same day**, to Diane Dixon at University of Stirling using one of the FREEPOST envelopes provided.

Please read the questions carefully and try to answer each one. There are no right or wrong answers. It is your views that we are interested in.

#### How to answer

When answering the questions, just think about the pack you used today, whether it is your own pack or the brown pack that you were provided with.

In most of the questions you are asked to put a cross in a box, to show which of the two responses is closest to what you think. The closer the box is to the response the more strongly you agree with it.

**EXAMPLE** How do you feel about travelling by train?

*(Please put a cross in only ONE box, on each line, to show what you think)*

|               |                                     |                          |                          |                                     |                          |                 |
|---------------|-------------------------------------|--------------------------|--------------------------|-------------------------------------|--------------------------|-----------------|
|               | 1                                   | 2                        | 3                        | 4                                   | 5                        |                 |
| Dislike a lot | <input type="checkbox"/>            | <input type="checkbox"/> | <input type="checkbox"/> | <input checked="" type="checkbox"/> | <input type="checkbox"/> | Like a lot      |
| Comfortable   | <input checked="" type="checkbox"/> | <input type="checkbox"/> | <input type="checkbox"/> | <input type="checkbox"/>            | <input type="checkbox"/> | Not comfortable |

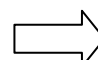

**Q1** Which pack did you use today?

*(Please put a cross in only ONE box)*

The brown pack (Kerros)

1

Your own pack

2

**Q2** What do you think of the pack that you used today?

*(Please put a cross in only ONE box, on each line, to show what you think)*

|   |              | 1                        | 2                                   | 3                        | 4                        | 5                        |               |
|---|--------------|--------------------------|-------------------------------------|--------------------------|--------------------------|--------------------------|---------------|
| 1 | Not stylish  | <input type="checkbox"/> | <input type="checkbox"/>            | <input type="checkbox"/> | <input type="checkbox"/> | <input type="checkbox"/> | Stylish       |
| 2 | Fashionable  | <input type="checkbox"/> | <input type="checkbox"/>            | <input type="checkbox"/> | <input type="checkbox"/> | <input type="checkbox"/> | Unfashionable |
| 3 | Cheap        | <input type="checkbox"/> | <input type="checkbox"/>            | <input type="checkbox"/> | <input type="checkbox"/> | <input type="checkbox"/> | Expensive     |
| 4 | Uncool       | <input type="checkbox"/> | <input type="checkbox"/>            | <input type="checkbox"/> | <input type="checkbox"/> | <input type="checkbox"/> | Cool          |
| 5 | Attractive   | <input type="checkbox"/> | <input type="checkbox"/>            | <input type="checkbox"/> | <input type="checkbox"/> | <input type="checkbox"/> | Unattractive  |
| 6 | Poor quality | <input type="checkbox"/> | <input checked="" type="checkbox"/> | <input type="checkbox"/> | <input type="checkbox"/> | <input type="checkbox"/> | Good quality  |
| 7 | Appealing    | <input type="checkbox"/> | <input type="checkbox"/>            | <input type="checkbox"/> | <input type="checkbox"/> | <input type="checkbox"/> | Unappealing   |

**Q3** How did the pack you used today make you feel?

*(Please put a cross in only ONE box, on each line, to show what you think)*

|   |             | 1                        | 2                        | 3                        | 4                        | 5                                   |                 |
|---|-------------|--------------------------|--------------------------|--------------------------|--------------------------|-------------------------------------|-----------------|
| 1 | Embarrassed | <input type="checkbox"/>            | Not embarrassed |
| 2 | Ashamed     | <input type="checkbox"/>            | Not ashamed     |
| 3 | Accepted    | <input type="checkbox"/> | <input type="checkbox"/> | <input type="checkbox"/> | <input type="checkbox"/> | <input checked="" type="checkbox"/> | Unaccepted      |

**Q4** How did the pack you used today make you feel about smoking?

*(Please put a cross in only ONE box, on each line, to show what you think)*

|   |            | 1                        | 2                        | 3                        | 4                        | 5                        |                |
|---|------------|--------------------------|--------------------------|--------------------------|--------------------------|--------------------------|----------------|
| 1 | Enjoyable  | <input type="checkbox"/> | Not enjoyable  |
| 2 | Satisfying | <input type="checkbox"/> | Not satisfying |
| 3 | Bad        | <input type="checkbox"/> | Good           |

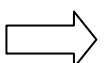

**Q5** What do you think about the health warnings that were on the pack you used today?

*(Please put a cross in only ONE box, on each line, to show what you think)*

|   |                   |                          |                          |                          |                          |                          |                 |
|---|-------------------|--------------------------|--------------------------|--------------------------|--------------------------|--------------------------|-----------------|
|   |                   | 1                        | 2                        | 3                        | 4                        | 5                        |                 |
| 1 | Hardly noticeable | <input type="checkbox"/> | Very noticeable |
| 2 | Serious           | <input type="checkbox"/> | Not serious     |
| 3 | Not believable    | <input type="checkbox"/> | Believable      |

**Q6** Still thinking about the warnings that were on the pack you used today, did you...?

*(Please put a cross in only ONE box, on each line, to show what you think)*

|   |                                        |                          |                          |                          |                          |                          |                                            |
|---|----------------------------------------|--------------------------|--------------------------|--------------------------|--------------------------|--------------------------|--------------------------------------------|
|   |                                        | 1                        | 2                        | 3                        | 4                        | 5                        |                                            |
| 1 | Look closely at them                   | <input type="checkbox"/> | Not look closely at them                   |
| 2 | Think about what they were telling you | <input type="checkbox"/> | Not think about what they were telling you |

**Q7** Did the pack you used today cause you to do any of the following?

*(Please put a cross in only ONE box, on each line)*

|   |                                                                    |                          |                          |
|---|--------------------------------------------------------------------|--------------------------|--------------------------|
|   |                                                                    | Yes                      | No                       |
|   |                                                                    | 1                        | 2                        |
| 1 | Stub out a cigarette before you had finished it?                   | <input type="checkbox"/> | <input type="checkbox"/> |
| 2 | Stop you from having a cigarette when you were about to smoke one? | <input type="checkbox"/> | <input type="checkbox"/> |
| 3 | Keep the packet out of sight?                                      | <input type="checkbox"/> | <input type="checkbox"/> |
| 4 | Cover the pack (using a cigarette case for example)?               | <input type="checkbox"/> | <input type="checkbox"/> |
| 5 | Smoke less around others?                                          | <input type="checkbox"/> | <input type="checkbox"/> |
| 6 | Think about quitting smoking?                                      | <input type="checkbox"/> | <input type="checkbox"/> |
| 7 | Want to quit smoking?                                              | <input type="checkbox"/> | <input type="checkbox"/> |

**Q8** Approximately how many cigarettes did you smoke yesterday?

*(Please write in number below)*

.....



1  
2  
3  
4  
5  
6  
7  
8  
9  
10  
11  
12  
13  
14  
15  
16  
17  
18  
19  
20  
21  
22  
23  
24  
25  
26  
27  
28  
29  
30  
31  
32  
33  
34  
35  
36  
37  
38  
39  
40  
41  
42  
43  
44  
45  
46  
47  
48  
49  
50  
51  
52  
53  
54  
55  
56  
57  
58  
59  
60

**Q9**

If you have any comments that you wish to make about the pack you used today please use the space below.

.....

.....

.....

.....

.....

.....

**What to do now**

Please check you have answered all the questions and then return it, **today**, in one of the envelopes provided. There is no need to use a stamp. If you have lost one of the envelopes, our FREEPOST address is:

**Diane Dixon**  
**Freepost RLTB-ZEES-HBRH**  
**Institute for Social Marketing**  
**University of Stirling**  
**STIRLING**  
**FK9 4LA**

For peer review only
